# Supplementary material
Source: PubMed Central journal article supplement (PMC4346189)
Supplement: NIHMS665420-supplement-01.pdf [file NIHMS665420-supplement-01.pdf]

**Supplemental Table 1.** Differential gene expression (averages, Avg) in cultured endometrial stromal cells (T-HESC) under conditions (Ctl), treated with estrogen plus progesterone (E+P), treated with macrophage conditioned medium (Mph CM), or treated with E+P+Mph CM.<sup>a</sup>

| GenBank<br>Accession #     | Description                                                       | Ctl<br>Avg | E+P<br>Avg | Mph<br>CM | E+P+<br>MphCM | p<br>value |
|----------------------------|-------------------------------------------------------------------|------------|------------|-----------|---------------|------------|
| <b>Signal Transduction</b> |                                                                   |            |            |           |               |            |
| NM_144497                  | A kinase (PRKA) anchor protein (gravin) 12 (AKAP12)               | 90.41      | 50.63      | 39.64     | 38.05         | 0.023      |
| NM_005737                  | ADP-ribosylation factor-like 7 (ARL7)                             | 1.43       | 1.18       | 2.78      | 1.32          | 0.024      |
| NM_000682                  | adrenergic, alpha-2B-, receptor (ADRA2B)                          | 1.41       | 1.90       | 6.80      | 10.76         | 0.018      |
| NM_000683                  | adrenergic, alpha-2C-, receptor (ADRA2C)                          | 3.76       | 15.91      | 1.11      | 3.81          | 0.015      |
| NM_014840                  | AMP-activated protein kinase family member 5 (ARK5)               | 3.28       | 2.34       | 9.28      | 3.69          | 0.047      |
| NM_000484                  | amyloid beta (A4) precursor protein (protease nexin-II) (APP)     | 44.47      | 26.38      | 28.65     | 20.42         | 0.025      |
| NM_020350                  | angiotensin II receptor-associated protein (AGTRAP)               | 9.41       | 8.77       | 22.47     | 20.23         | 0.021      |
| NM_018153                  | anthrax toxin receptor 1 (ANTXR1)                                 | 27.51      | 48.51      | 12.07     | 17.55         | 0.033      |
| NM_001165                  | baculoviral IAP repeat-containing 3 (BIRC3)                       | 0.31       | 0.37       | 1.92      | 1.20          | 0.047      |
| NM_000623                  | bradykinin receptor B2 (BDKRB2)                                   | 59.53      | 35.75      | 20.98     | 26.34         | 0.023      |
| NM_031908                  | C1q and tumor necrosis factor related protein 2 (C1QTNF2)         | 2.34       | 1.28       | 1.47      | 1.02          | 0.033      |
| NM_001740                  | calbindin 2, 29kDa (calretinin) (CALB2)                           | 0.83       | 0.87       | 12.85     | 4.56          | 0.022      |
| NM_014478                  | calcitonin gene-related peptide-receptor component protein (RCP9) | 3.58       | 2.21       | 2.29      | 1.50          | 0.042      |
| NM_001896                  | casein kinase 2, alpha prime polypeptide (CSNK2A2)                | 17.39      | 18.19      | 7.87      | 8.54          | 0.030      |
| NM_012121                  | CDC42 effector protein (Rho GTPase binding) 4 (CDC42EP4)          | 18.60      | 13.40      | 9.39      | 9.00          | 0.037      |
| NM_001878                  | cellular retinoic acid binding protein 2 (CRABP2)                 | 41.79      | 32.32      | 6.47      | 7.79          | 0.024      |
| NM_015242                  | centaurin, delta 2 (CENTD2)                                       | 10.91      | 7.16       | 4.61      | 4.00          | 0.031      |
| NM_001822                  | chimerin (chimaerin) 1 (CHN1)                                     | 95.69      | 81.08      | 48.49     | 32.45         | 0.043      |
| NM_005242                  | coagulation factor II (thrombin) receptor-like 1 (F2RL1)          | 0.90       | 0.20       | 9.10      | 0.75          | 0.022      |
| BC070085                   | colony stimulating factor 2 receptor, beta, low-affinity          | 1.60       | 0.51       | 20.84     | 6.07          | 0.026      |
| NM_000760                  | colony stimulating factor 3 receptor (granulocyte) (CSF3R)        | 0.87       | 1.24       | 1.54      | 2.27          | 0.022      |
| NM_001901                  | connective tissue growth factor (CTGF)                            | 91.72      | 36.09      | 592.80    | 232.97        | 0.015      |
| NM_016651                  | dapper homolog 1, antagonist of beta-catenin (DACT1)              | 3.32       | 1.53       | 8.59      | 1.95          | 0.020      |
| NM_013989                  | deiodinase, iodothyronine, type II (DIO2)                         | 1.44       | 1.99       | 9.49      | 3.56          | 0.014      |
| NM_019074                  | delta-like 4 (DLL4)                                               | 1.58       | 1.93       | 3.63      | 3.35          | 0.030      |
| NM_001388                  | developmentally regulated GTP binding protein 2 (DRG2)            | 2.74       | 2.38       | 1.19      | 1.27          | 0.026      |
| NM_014421                  | dickkopf homolog 2 (DKK2)                                         | 5.78       | 1.17       | 0.47      | 1.01          | 0.015      |
| NM_004417                  | dual specificity phosphatase 1 (DUSP1)                            | 1.62       | 2.05       | 4.18      | 4.61          | 0.029      |
| NM_004419                  | dual specificity phosphatase 5 (DUSP5)                            | 1.47       | 1.32       | 2.80      | 5.92          | 0.015      |
| NM_001953                  | endothelial cell growth factor 1 (platelet-derived) (ECGF1)       | 0.45       | 0.60       | 2.22      | 3.00          | 0.042      |

|           |                                                                                           |       |       |       |       |       |
|-----------|-------------------------------------------------------------------------------------------|-------|-------|-------|-------|-------|
| NM_005226 | endothelial differentiation, sphingolipid G-protein-coupled receptor, 3 (EDG3)            | 85.72 | 95.47 | 29.62 | 24.54 | 0.018 |
| NM_004438 | EphA4 (EPHA4)                                                                             | 6.10  | 4.90  | 2.23  | 2.53  | 0.043 |
| NM_004444 | EphB4 (EPHB4)                                                                             | 17.26 | 14.68 | 8.56  | 5.76  | 0.031 |
| NM_004951 | Epstein-Barr virus induced gene 2 (lymphocyte-specific G protein-coupled receptor) (EBI2) | 0.94  | 0.31  | 3.04  | 0.80  | 0.023 |
| NM_033136 | fibroblast growth factor 1 (acidic) (FGF1)                                                | 1.24  | 0.73  | 3.32  | 1.96  | 0.034 |
| NM_002006 | fibroblast growth factor 2 (basic) (FGF2)                                                 | 13.27 | 10.68 | 37.83 | 20.51 | 0.012 |
| NM_004117 | FK506 binding protein 5 (FKBP5)                                                           | 0.28  | 1.96  | 0.57  | 1.88  | 0.031 |
| NM_001459 | fms-related tyrosine kinase 3 ligand (FLT3LG)                                             | 6.09  | 5.28  | 3.15  | 2.81  | 0.036 |
| NM_153047 | FYN oncogene related to SRC, FGR, YES (FYN)                                               | 82.73 | 69.82 | 31.33 | 51.18 | 0.034 |
| NM_153442 | G protein-coupled receptor 26 (GPR26)                                                     | 1.58  | 1.79  | 3.68  | 4.40  | 0.026 |
| NM_001505 | G protein-coupled receptor 30 (GPR30)                                                     | 2.08  | 1.72  | 0.85  | 0.43  | 0.042 |
| NM_005458 | G protein-coupled receptor 51 (GPR51)                                                     | 5.58  | 6.20  | 12.02 | 14.30 | 0.034 |
| NM_005684 | G protein-coupled receptor 52 (GPR52)                                                     | 1.21  | 1.63  | 2.27  | 3.56  | 0.032 |
| NM_005308 | G protein-coupled receptor kinase 5 (GRK5)                                                | 5.72  | 2.58  | 2.10  | 1.60  | 0.043 |
| NM_014710 | G protein-coupled receptor-associated sorting protein (GASP)                              | 1.58  | 1.48  | 0.78  | 0.81  | 0.020 |
| BC013576  | GASP2 protein                                                                             | 24.17 | 14.10 | 13.62 | 9.84  | 0.031 |
| NM_013372 | gremlin 1 homolog, cysteine knot superfamily (GREM1)                                      | 2.79  | 2.08  | 16.70 | 14.21 | 0.028 |
| NM_000557 | growth differentiation factor 5 (cartilage-derived morphogenetic protein-1) (GDF5)        | 0.77  | 0.90  | 1.59  | 3.97  | 0.021 |
| NM_016194 | guanine nucleotide binding protein (G protein), beta 5 (GNB5)                             | 47.81 | 22.79 | 17.01 | 14.99 | 0.038 |
| NM_016315 | GULP, engulfment adaptor PTB domain containing 1 (GULP1)                                  | 8.55  | 9.64  | 4.07  | 3.32  | 0.034 |
| NM_007069 | HRAS-like suppressor 3 (HRASLS3)                                                          | 26.36 | 19.23 | 11.81 | 11.74 | 0.038 |
| NM_022460 | HS1-binding protein 3                                                                     | 9.95  | 6.85  | 4.25  | 5.29  | 0.044 |
| NM_002192 | inhibin, beta A (activin A, activin AB alpha polypeptide) (INHBA)                         | 17.49 | 17.04 | 84.96 | 48.10 | 0.022 |
| NM_002222 | inositol 1,4,5-triphosphate receptor, type 1 (ITPR1)                                      | 2.50  | 3.83  | 0.80  | 0.91  | 0.014 |
| NM_002221 | inositol 1,4,5-trisphosphate 3-kinase B (ITPKB)                                           | 3.79  | 2.46  | 2.19  | 1.87  | 0.037 |
| NM_014214 | inositol(myo)-1(or 4)-monophosphatase 2 (IMPA2)                                           | 6.45  | 20.35 | 3.17  | 13.55 | 0.025 |
| NM_198336 | insulin induced gene 1 (INSIG1)                                                           | 3.67  | 2.90  | 8.99  | 10.79 | 0.019 |
| NM_000599 | insulin-like growth factor binding protein 5 (IGFBP5)                                     | 0.47  | 0.77  | 2.77  | 1.26  | 0.049 |
| NM_004972 | Janus kinase 2 (a protein tyrosine kinase) (JAK2)                                         | 6.05  | 9.63  | 2.86  | 3.79  | 0.034 |
| NM_006611 | killer cell lectin-like receptor subfamily A, member 1 (KLRA1)                            | 2.01  | 1.89  | 0.96  | 0.97  | 0.034 |
| NM_015236 | latrophilin 3 (LPHN3)                                                                     | 36.57 | 29.47 | 5.63  | 5.74  | 0.016 |
| NM_006863 | leukocyte immunoglobulin-like receptor, subfamily A (with TM domain), member 1 (LILRA1)   | 1.69  | 2.25  | 4.57  | 2.94  | 0.037 |
| NM_014449 | likely ortholog of mouse gene rich cluster, A gene (GRCA)                                 | 6.12  | 4.16  | 2.34  | 2.13  | 0.019 |
| NM_032641 | likely ortholog of mouse gene rich cluster, C9 gene (GRCC9)                               | 9.26  | 8.06  | 4.47  | 4.54  | 0.045 |

|              |                                                                                                |        |        |       |       |       |
|--------------|------------------------------------------------------------------------------------------------|--------|--------|-------|-------|-------|
| NM_144641    | likely ortholog of mouse protein phosphatase 2C eta                                            | 9.61   | 8.17   | 4.50  | 4.71  | 0.038 |
| NM_030952    | likely ortholog of rat SNF1/AMP-activated protein kinase (SNARK)                               | 2.10   | 1.50   | 4.25  | 5.03  | 0.029 |
| NM_012320    | lysophospholipase 3 (lysosomal phospholipase A2) (LYPLA3)                                      | 2.06   | 1.90   | 12.76 | 20.96 | 0.014 |
| NM_199054    | MAP kinase-interacting serine/threonine kinase 2 (MKNK2)                                       | 3.74   | 2.62   | 1.22  | 1.18  | 0.021 |
| NM_145015    | MAS-related GPR, member F (MRGPRF)                                                             | 4.72   | 4.40   | 2.03  | 3.03  | 0.030 |
| NM_000529    | melanocortin 2 receptor (adrenocorticotrophic hormone) (MC2R)                                  | 0.97   | 1.27   | 2.02  | 1.90  | 0.032 |
| NM_002391    | midkine (neurite growth-promoting factor 2) (MDK)                                              | 149.15 | 127.23 | 76.38 | 68.19 | 0.039 |
| NM_001001931 | mitochondrial tumor suppressor 1 (MTUS1)                                                       | 23.80  | 7.41   | 8.10  | 5.04  | 0.039 |
| NM_002754    | mitogen-activated protein kinase 13 (MAPK13)                                                   | 1.81   | 1.35   | 4.40  | 2.92  | 0.026 |
| NM_145110    | mitogen-activated protein kinase kinase 3 (MAP2K3)                                             | 9.47   | 6.16   | 20.41 | 19.41 | 0.022 |
| NM_005204    | mitogen-activated protein kinase kinase kinase 8 (MAP3K8)                                      | 1.55   | 1.23   | 4.61  | 11.32 | 0.013 |
| NM_031419    | molecule possessing ankyrin repeats induced by lipopolysaccharide (MAIL)                       | 10.83  | 10.40  | 23.19 | 19.52 | 0.041 |
| NM_002506    | nerve growth factor, beta polypeptide (NGFB)                                                   | 5.02   | 1.35   | 2.15  | 1.53  | 0.018 |
| NM_006403    | neural precursor cell expressed, developmentally down-regulated 9 (NEDD9)                      | 0.84   | 0.94   | 2.28  | 1.34  | 0.019 |
| NM_014284    | neurochondrin (NCDN)                                                                           | 7.20   | 6.51   | 3.73  | 4.93  | 0.030 |
| NM_139160    | novel 583 KDA protein (LOC91614)                                                               | 2.85   | 1.61   | 5.74  | 4.25  | 0.030 |
| NM_002502    | nuclear factor of kappa light polypeptide gene enhancer in B-cells 2 (p49/p100) (NFKB2)        | 0.99   | 0.92   | 2.29  | 2.17  | 0.030 |
| NM_020529    | nuclear factor of kappa light polypeptide gene enhancer in B-cells inhibitor, alpha (NFKBIA)   | 8.88   | 12.89  | 16.41 | 26.76 | 0.031 |
| NM_004556    | nuclear factor of kappa light polypeptide gene enhancer in B-cells inhibitor, epsilon (NFKBIE) | 2.85   | 1.58   | 6.26  | 4.70  | 0.019 |
| NM_005007    | nuclear factor of kappa light polypeptide gene enhancer in B-cells inhibitor-like 1 (NFKBIL1)  | 20.23  | 17.89  | 9.57  | 10.26 | 0.036 |
| NM_005126    | nuclear receptor subfamily 1, group D, member 2 (NR1D2)                                        | 2.93   | 2.01   | 1.88  | 1.13  | 0.041 |
| NM_021005    | nuclear receptor subfamily 2, group F, member 2 (NR2F2)                                        | 12.88  | 7.19   | 6.13  | 5.45  | 0.024 |
| NM_003999    | oncostatin M receptor (OSMR)                                                                   | 2.20   | 8.17   | 7.95  | 6.91  | 0.041 |
| NM_033014    | osteolectin (osteogenic factor, mimecan) (OGN)                                                 | 2.24   | 7.89   | 0.65  | 1.97  | 0.031 |
| NM_000916    | oxytocin receptor (OXTR)                                                                       | 6.73   | 5.81   | 29.80 | 26.53 | 0.020 |
| NM_003711    | phosphatidic acid phosphatase type 2A (PPAP2A)                                                 | 80.83  | 110.17 | 23.13 | 28.42 | 0.015 |
| NM_005028    | phosphatidylinositol-4-phosphate 5-kinase, type II, alpha (PIP5K2A)                            | 1.64   | 1.44   | 0.82  | 0.77  | 0.035 |
| NM_005019    | phosphodiesterase 1A, calmodulin-dependent (PDE1A)                                             | 1.99   | 1.58   | 0.30  | 1.15  | 0.026 |
| NM_006202    | phosphodiesterase 4A, cAMP-specific (PDE4A)                                                    | 6.60   | 5.72   | 2.87  | 3.17  | 0.026 |
| NM_001083    | phosphodiesterase 5A, cGMP-specific (PDE5A)                                                    | 1.80   | 1.39   | 0.75  | 0.58  | 0.022 |
| NM_005026    | phosphoinositide-3-kinase, catalytic, delta polypeptide (PIK3CD)                               | 2.36   | 1.72   | 4.91  | 2.89  | 0.031 |

|           |                                                                                    |       |       |       |        |       |
|-----------|------------------------------------------------------------------------------------|-------|-------|-------|--------|-------|
| NM_002646 | phosphoinositide-3-kinase, class 2, beta polypeptide (PIK3C2B)                     | 6.62  | 5.10  | 1.58  | 1.97   | 0.026 |
| NM_181523 | phosphoinositide-3-kinase, regulatory subunit, polypeptide 1 (p85 alpha) (PIK3R1)  | 42.00 | 56.95 | 14.63 | 33.99  | 0.031 |
| NM_003629 | phosphoinositide-3-kinase, regulatory subunit, polypeptide 3 (p55, gamma) (PIK3R3) | 23.60 | 13.79 | 6.42  | 5.46   | 0.032 |
| NM_019012 | phosphoinositol 3-phosphate-binding protein-2 (PEPP2)                              | 8.18  | 6.96  | 4.59  | 3.97   | 0.041 |
| NM_002667 | phospholamban (PLN)                                                                | 0.40  | 0.55  | 15.36 | 4.48   | 0.012 |
| NM_015192 | phospholipase C, beta 1 (phosphoinositide-specific) (PLCB1)                        | 4.37  | 2.71  | 1.14  | 1.39   | 0.023 |
| NM_020353 | phospholipid scramblase 4 (PLSCR4)                                                 | 29.06 | 18.17 | 12.38 | 12.85  | 0.039 |
| NM_025208 | platelet derived growth factor D (PDGFD)                                           | 4.50  | 8.02  | 0.93  | 2.76   | 0.026 |
| NM_002609 | platelet-derived growth factor receptor, beta polypeptide (PDGFRB)                 | 21.53 | 16.34 | 10.76 | 11.65  | 0.030 |
| NM_006622 | polo-like kinase 2 (PLK2)                                                          | 9.83  | 4.70  | 3.90  | 6.09   | 0.034 |
| NM_153026 | prickle-like 1 (PRICKLE1) [Wnt pathway]                                            | 71.53 | 54.57 | 48.16 | 32.39  | 0.042 |
| NM_024897 | progesterone and adipoQ receptor family member VI (PAQR6)                          | 2.28  | 3.21  | 1.00  | 1.26   | 0.034 |
| NM_024430 | proline-serine-threonine phosphatase interacting protein 2 (PSTPIP2)               | 1.56  | 1.21  | 3.28  | 2.55   | 0.048 |
| NM_020440 | prostaglandin F2 receptor negative regulator (PTGFRN)                              | 19.87 | 10.87 | 10.17 | 8.48   | 0.012 |
| NM_002737 | protein kinase C, alpha (PRKCA)                                                    | 1.84  | 1.34  | 1.08  | 0.89   | 0.036 |
| NM_006255 | protein kinase C, eta (PRKCH)                                                      | 0.62  | 0.96  | 1.81  | 2.35   | 0.039 |
| NM_005398 | protein phosphatase 1, regulatory (inhibitor) subunit 3C (PPP1R3C)                 | 41.40 | 22.30 | 13.06 | 15.23  | 0.037 |
| BC067106  | putative G protein coupled receptor                                                | 5.28  | 5.08  | 15.39 | 12.99  | 0.024 |
| NM_016277 | RAB23, member RAS oncogene family (RAB23)                                          | 69.28 | 78.58 | 31.33 | 40.69  | 0.014 |
| NM_004794 | RAB33A, member RAS oncogene family (RAB33A)                                        | 2.93  | 3.50  | 1.43  | 1.29   | 0.025 |
| NM_022337 | RAB38, member RAS oncogene family (RAB38)                                          | 1.54  | 0.68  | 0.51  | 0.98   | 0.038 |
| NM_002867 | RAB3B, member RAS oncogene family (RAB3B)                                          | 4.66  | 2.36  | 9.18  | 5.60   | 0.032 |
| NM_006822 | RAB40B, member RAS oncogene family (RAB40B)                                        | 13.07 | 12.64 | 3.89  | 5.19   | 0.022 |
| NM_015149 | ras guanine nucleotide dissociation stimulator-like 1 (RGL1)                       | 30.39 | 10.33 | 10.41 | 9.81   | 0.032 |
| NM_005739 | RAS guanyl releasing protein 1 (calcium and DAG-regulated) (RASGRP1)               | 4.18  | 3.13  | 14.06 | 19.47  | 0.010 |
| NM_004675 | ras homolog gene family, member I (ARHI)                                           | 1.01  | 0.35  | 4.69  | 6.73   | 0.024 |
| NM_022157 | Ras-related GTP binding C (RRAGC)                                                  | 3.66  | 2.69  | 1.73  | 1.96   | 0.031 |
| NM_005854 | receptor (calcitonin) activity modifying protein 2 (RAMP2)                         | 2.41  | 2.77  | 1.16  | 1.21   | 0.045 |
| NM_198230 | regulator of G-protein signalling 12 (RGS12)                                       | 4.51  | 3.57  | 1.79  | 1.41   | 0.034 |
| NM_002928 | regulator of G-protein signalling 16 (RGS16)                                       | 0.64  | 0.79  | 2.38  | 5.24   | 0.027 |
| NM_014059 | response gene to complement 32 (RGC32)                                             | 28.12 | 23.67 | 60.89 | 120.97 | 0.022 |
| NM_004585 | retinoic acid receptor responder 3 (RARRES3)                                       | 26.32 | 20.31 | 8.85  | 10.66  | 0.049 |
| NM_002899 | retinol binding protein 1, cellular (RBP1)                                         | 16.66 | 15.66 | 10.73 | 8.14   | 0.028 |
| NM_001175 | Rho GDP dissociation inhibitor (GDI) beta (ARHGDI2)                                | 9.51  | 6.45  | 18.90 | 14.20  | 0.024 |

|           |                                                                                    |       |       |       |       |       |
|-----------|------------------------------------------------------------------------------------|-------|-------|-------|-------|-------|
| NM_020809 | Rho GTPase activating protein 20 (ARHGAP20)                                        | 22.24 | 25.79 | 8.43  | 7.14  | 0.033 |
| NM_020824 | Rho GTPase activating protein 21 (ARHGAP21)                                        | 6.42  | 4.52  | 3.17  | 2.49  | 0.023 |
| NM_013427 | Rho GTPase activating protein 6 (ARHGAP6)                                          | 11.18 | 15.17 | 1.90  | 5.51  | 0.013 |
| NM_019555 | Rho guanine nucleotide exchange factor (GEF) 3 (ARHGEF3)                           | 0.62  | 0.55  | 1.81  | 2.20  | 0.019 |
| NM_004755 | ribosomal protein S6 kinase, 90kDa, polypeptide 5 (RPS6KA5)                        | 6.07  | 3.58  | 1.32  | 0.81  | 0.020 |
| NM_002961 | S100 calcium binding protein A4 (S100A4)                                           | 52.98 | 76.21 | 18.22 | 30.20 | 0.024 |
| NM_020796 | sema domain, transmembrane domain, and cytoplasmic domain (semaphorin) 6A (SEMA6A) | 7.51  | 5.65  | 0.96  | 2.20  | 0.015 |
| NM_030754 | serum amyloid A2 (SAA2)                                                            | 2.77  | 3.17  | 3.98  | 23.65 | 0.037 |
| NM_004657 | serum deprivation response (phosphatidylserine binding protein) (SDPR)             | 5.59  | 5.51  | 2.08  | 2.02  | 0.030 |
| NM_012309 | SH3 and multiple ankyrin repeat domains 2 (SHANK2)                                 | 4.01  | 5.39  | 6.45  | 7.80  | 0.034 |
| NM_004844 | SH3-domain binding protein 5 (BTK-associated) (SH3BP5)                             | 24.40 | 14.41 | 10.18 | 6.90  | 0.019 |
| NM_020974 | signal peptide, CUB domain, EGF-like 2 (SCUBE2)                                    | 7.58  | 8.80  | 3.32  | 3.32  | 0.028 |
| NM_020808 | signal-induced proliferation-associated 1 like 2 (SIPA1L2)                         | 15.70 | 2.50  | 1.32  | 1.38  | 0.021 |
| R02198    | similar to blue-sensitive opsin                                                    | 10.51 | 7.94  | 21.64 | 15.97 | 0.034 |
| NM_172069 | similar to PH (pleckstrin homology) domain                                         | 3.93  | 2.94  | 0.89  | 0.82  | 0.024 |
| NM_177403 | similar to RAB7, member RAS oncogene family (MGC9726)                              | 4.47  | 3.23  | 1.16  | 1.64  | 0.023 |
| NM_005585 | SMAD, mothers against DPP homolog 6 (SMAD6)                                        | 3.95  | 2.71  | 2.01  | 1.62  | 0.036 |
| NM_015385 | sorbin and SH3 domain containing 1 (SORBS1)                                        | 0.95  | 1.39  | 0.95  | 3.77  | 0.047 |
| NM_015180 | spectrin repeat containing, nuclear envelope 2 (SYNE2)                             | 3.52  | 1.94  | 1.80  | 1.13  | 0.021 |
| NM_003127 | spectrin, alpha, non-erythrocytic 1 (alpha-fodrin) (SPTAN1)                        | 50.82 | 36.63 | 30.05 | 24.94 | 0.032 |
| NM_006714 | sphingomyelin phosphodiesterase, acid-like 3A (SMPDL3A)                            | 34.87 | 32.65 | 9.87  | 14.03 | 0.018 |
| NM_021972 | sphingosine kinase 1 (SPHK1)                                                       | 0.94  | 0.36  | 3.76  | 2.11  | 0.036 |
| NM_005841 | sprouty homolog 1, antagonist of FGF signaling (SPRY1)                             | 3.95  | 1.80  | 1.23  | 1.03  | 0.046 |
| NM_025106 | SPRY domain-containing SOCS box protein SSB-1 (SSB1)                               | 6.07  | 5.23  | 17.10 | 7.58  | 0.029 |
| NM_006748 | Src-like-adaptor (SLA)                                                             | 0.51  | 0.36  | 2.13  | 3.79  | 0.047 |
| NM_003714 | stanniocalcin 2 (STC2)                                                             | 5.08  | 3.23  | 12.17 | 30.62 | 0.020 |
| NM_003955 | suppressor of cytokine signaling 3                                                 | 0.30  | 0.47  | 1.64  | 1.47  | 0.033 |
| NM_016945 | taste receptor, type 2, member 16 (TAS2R16)                                        | 2.66  | 2.93  | 6.88  | 7.13  | 0.027 |
| NM_015173 | TBC1 (tre-2/USP6, BUB2, cdc16) domain family, member 1 (TBC1D1)                    | 1.55  | 1.81  | 3.51  | 4.22  | 0.045 |
| NM_170754 | tensin like C1 domain containing phosphatase (TENC1)                               | 7.41  | 5.97  | 3.37  | 4.08  | 0.036 |
| NM_006531 | tetratricopeptide repeat domain 10 (TTC10)                                         | 3.57  | 2.43  | 1.30  | 1.43  | 0.034 |
| NM_003597 | TGFB inducible early growth response 2 (TIEG2)                                     | 14.05 | 14.04 | 7.31  | 6.60  | 0.036 |

|           |                                                                        |       |       |        |       |       |
|-----------|------------------------------------------------------------------------|-------|-------|--------|-------|-------|
| NM_021809 | TGFB-induced factor 2 (TALE family homeobox) (TGIF2)                   | 5.31  | 4.52  | 3.54   | 2.15  | 0.047 |
| NM_003250 | thyroid hormone receptor, alpha (v-erb-a oncogene homolog) (THRA)      | 8.94  | 7.48  | 2.76   | 3.70  | 0.013 |
| NM_013381 | thyrotropin-releasing hormone degrading ectoenzyme (TRHDE)             | 4.69  | 4.38  | 3.74   | 2.11  | 0.019 |
| NM_006058 | TNFAIP3 interacting protein 1 (TNIP1)                                  | 5.18  | 3.84  | 10.33  | 9.55  | 0.038 |
| NM_005647 | transducin (beta)-like 1X-linked (TBL1X)                               | 27.86 | 19.94 | 10.25  | 11.60 | 0.026 |
| NM_005077 | transducin-like enhancer of split 1 (E(sp1) homolog) (TLE1)            | 38.46 | 26.59 | 14.02  | 17.16 | 0.036 |
| NM_007005 | transducin-like enhancer of split 4 (E(sp1) homolog) (TLE4)            | 12.80 | 8.10  | 7.67   | 4.92  | 0.021 |
| NM_003239 | transforming growth factor, beta 3 (TGFB3)                             | 2.05  | 0.83  | 0.84   | 0.46  | 0.028 |
| NM_005423 | trefoil factor 2 (spasmolytic protein 1) (TFF2)                        | 10.26 | 12.13 | 13.65  | 20.95 | 0.017 |
| NM_025195 | tribbles homolog 1 (TRIB1)                                             | 1.78  | 1.94  | 4.25   | 3.00  | 0.029 |
| NM_021158 | tribbles homolog 3 (TRIB3)                                             | 8.16  | 4.92  | 1.47   | 1.81  | 0.033 |
| NM_016175 | truncated calcium binding protein                                      | 20.27 | 19.53 | 9.49   | 11.33 | 0.026 |
| NM_003326 | tumor necrosis factor (ligand) superfamily, member 4 (TNFSF4)          | 5.87  | 4.68  | 24.52  | 11.21 | 0.013 |
| NM_002546 | tumor necrosis factor receptor superfamily 11b (TNFRSF11B)             | 1.92  | 1.72  | 10.15  | 4.67  | 0.013 |
| NM_016639 | tumor necrosis factor receptor superfamily, member 12A (TNFRSF12A)     | 40.73 | 18.11 | 127.28 | 75.70 | 0.019 |
| NM_016639 | tumor necrosis factor receptor superfamily, member 12A (TNFRSF12A)     | 20.47 | 9.99  | 68.26  | 41.42 | 0.022 |
| NM_032871 | tumor necrosis factor receptor superfamily, member 19-like (TNFRSF19L) | 2.38  | 2.14  | 4.93   | 3.81  | 0.020 |
| NM_032871 | tumor necrosis factor receptor superfamily, member 19-like (TNFRSF19L) | 0.95  | 0.81  | 2.09   | 1.16  | 0.021 |
| NM_001066 | tumor necrosis factor receptor superfamily, member 1B (TNFRSF1B)       | 3.65  | 5.26  | 6.05   | 11.30 | 0.039 |
| NM_014452 | tumor necrosis factor receptor superfamily, member 21 (TNFRSF21)       | 15.69 | 13.42 | 33.55  | 38.88 | 0.039 |
| NM_006290 | tumor necrosis factor, alpha-induced protein 3 (TNFAIP3)               | 0.88  | 2.14  | 2.91   | 5.08  | 0.024 |
| NM_006293 | TYRO3 protein tyrosine kinase (TYRO3)                                  | 14.18 | 15.96 | 6.08   | 7.42  | 0.038 |
| NM_005148 | unc-119 homolog (UNC119)                                               | 7.38  | 6.15  | 3.68   | 3.71  | 0.025 |
| NM_170744 | unc-5 homolog B (UNC5B) [netrin receptor]                              | 4.98  | 2.45  | 1.71   | 1.13  | 0.033 |
| NM_005239 | v-ets erythroblastosis virus E26 oncogene homolog 2 (ETS2)             | 5.09  | 4.98  | 2.42   | 4.42  | 0.026 |
| NM_012323 | v-maf musculoaponeurotic fibrosarcoma oncogene homolog F (MAFF)        | 1.86  | 1.35  | 5.50   | 3.82  | 0.023 |
| NM_002350 | v-yes-1 Yamaguchi sarcoma viral related oncogene homolog (LYN)         | 1.34  | 1.11  | 2.67   | 3.03  | 0.014 |
| NM_003882 | WNT1 inducible signaling pathway protein 1 (WISP1)                     | 0.88  | 0.65  | 2.43   | 3.76  | 0.019 |
|           | <b>Proteases and related</b>                                           |       |       |        |       |       |
| NM_033274 | a disintegrin and metalloproteinase domain 19 (meltrin beta) (ADAM19)  | 1.91  | 1.41  | 4.35   | 2.16  | 0.034 |
| NM_153202 | a disintegrin and metalloproteinase domain 33 (ADAM33)                 | 26.80 | 23.54 | 6.82   | 8.77  | 0.031 |
| NM_003817 | a disintegrin and metalloproteinase domain 7 (ADAM7)                   | 1.21  | 1.18  | 1.98   | 3.36  | 0.012 |

|                                   |                                                                                                         |        |        |        |        |       |
|-----------------------------------|---------------------------------------------------------------------------------------------------------|--------|--------|--------|--------|-------|
| NM_001109                         | a disintegrin and metalloproteinase domain 8 (ADAM8)                                                    | 5.57   | 4.53   | 4.24   | 2.55   | 0.029 |
| NM_006988                         | a disintegrin-like and metalloprotease (reprolysin type) with thrombospondin type 1 motif, 1 (ADAMTS1)  | 2.02   | 4.81   | 1.01   | 2.87   | 0.026 |
| NM_007038                         | a disintegrin-like and metalloprotease (reprolysin type) with thrombospondin type 1 motif, 5 (ADAMTS5)  | 31.10  | 48.86  | 9.96   | 14.69  | 0.022 |
| NM_000070                         | calpain 3, (p94) (CAPN3)                                                                                | 2.64   | 2.67   | 1.32   | 1.52   | 0.036 |
| NM_004079                         | cathepsin S (CTSS)                                                                                      | 2.33   | 1.81   | 5.16   | 3.30   | 0.018 |
| NM_016302                         | cereblon (CRBN)                                                                                         | 47.98  | 38.67  | 18.66  | 19.66  | 0.035 |
| NM_020169                         | latexin (LXN)                                                                                           | 14.74  | 9.79   | 49.42  | 10.75  | 0.041 |
| NM_002421                         | matrix metalloproteinase 1 (interstitial collagenase) (MMP1)                                            | 5.28   | 1.22   | 74.68  | 16.01  | 0.014 |
| NM_002422                         | matrix metalloproteinase 3 (stromelysin 1) (MMP3)                                                       | 1.75   | 1.70   | 78.19  | 25.54  | 0.022 |
| NM_002658                         | plasminogen activator, urokinase (PLAU)                                                                 | 26.22  | 15.76  | 69.90  | 22.29  | 0.038 |
| NM_002659                         | plasminogen activator, urokinase receptor (PLAUR)                                                       | 13.82  | 9.59   | 50.82  | 26.94  | 0.024 |
| NM_002575                         | serine (or cysteine) proteinase inhibitor, clade B2 (SERPINB2)                                          | 0.56   | 0.25   | 15.22  | 5.00   | 0.031 |
| NM_004568                         | serine (or cysteine) proteinase inhibitor, clade B6 (SERPINB6)                                          | 32.53  | 23.77  | 18.84  | 16.32  | 0.033 |
| NM_003784                         | serine (or cysteine) proteinase inhibitor, clade B7 (SERPINB7)                                          | 1.29   | 1.67   | 2.54   | 1.62   | 0.037 |
| NM_000602                         | serine (or cysteine) proteinase inhibitor, clade E1 (plasminogen activator inhibitor type 1) (SERPINE1) | 40.29  | 107.23 | 324.76 | 368.40 | 0.019 |
| NM_006216                         | serine (or cysteine) proteinase inhibitor, clade E2 (plasminogen activator inhibitor type 1) (SERPINE2) | 60.23  | 62.48  | 149.05 | 77.02  | 0.024 |
| NM_197941                         | similar to A disintegrin and metalloproteinase with thrombospondin motifs 10 (ADAM-TS 10)               | 1.68   | 1.46   | 3.25   | 1.57   | 0.038 |
| NM_021928                         | similar to signal peptidase SPC22/23 tetranectin (plasminogen binding protein) (TNA)                    | 17.05  | 15.37  | 38.41  | 39.08  | 0.014 |
| NM_003278                         |                                                                                                         | 47.09  | 176.60 | 21.66  | 93.87  | 0.014 |
| NM_006528                         | tissue factor pathway inhibitor 2 (TFPI2)                                                               | 113.56 | 73.13  | 228.52 | 196.02 | 0.019 |
| NM_000362                         | tissue inhibitor of metalloproteinase 3 (TIMP3)                                                         | 4.20   | 5.94   | 1.85   | 2.12   | 0.030 |
| <b>Steroid metabolism</b>         |                                                                                                         |        |        |        |        |       |
| NM_001353                         | aldo-keto reductase family 1, member C1 (AKR1C1)                                                        | 4.21   | 5.35   | 1.58   | 3.21   | 0.042 |
| NM_004391                         | cytochrome P450, family 8, subfamily B, polypeptide 1 (CYP8B1)                                          | 2.25   | 2.38   | 4.08   | 4.48   | 0.015 |
| NM_005525                         | hydroxysteroid (11-beta) dehydrogenase 1 (HSD11B1)                                                      | 0.89   | 4.14   | 22.58  | 73.58  | 0.009 |
| <b>Transcriptional regulation</b> |                                                                                                         |        |        |        |        |       |
| NM_004024                         | activating transcription factor 3 (ATF3)                                                                | 1.86   | 1.14   | 7.72   | 7.50   | 0.012 |
| NM_020183                         | aryl hydrocarbon receptor nuclear translocator-like 2 (ARNTL2)                                          | 1.35   | 1.10   | 6.07   | 3.82   | 0.014 |
| NM_032827                         | atonal homolog 8 (ATOH8)                                                                                | 13.40  | 10.03  | 6.91   | 11.79  | 0.041 |
| NM_003670                         | basic helix-loop-helix domain containing, class B, 2 (BHLHB2)                                           | 2.43   | 2.71   | 4.05   | 4.67   | 0.037 |

|           |                                                                                 |       |       |       |       |       |
|-----------|---------------------------------------------------------------------------------|-------|-------|-------|-------|-------|
| NM_013450 | bromodomain adjacent to zinc finger domain, 2B (BAZ2B)                          | 4.39  | 3.76  | 2.58  | 2.18  | 0.031 |
| NM_007371 | bromodomain containing 3 (BRD3)                                                 | 14.04 | 11.66 | 7.62  | 6.15  | 0.033 |
| NM_052854 | cAMP responsive element binding protein 3-like 1 (CREB3L1)                      | 28.53 | 19.97 | 15.20 | 12.87 | 0.033 |
| NM_005195 | CCAAT/enhancer binding protein (C/EBP), delta (CEBPD)                           | 6.45  | 10.75 | 17.93 | 37.25 | 0.021 |
| NM_001806 | CCAAT/enhancer binding protein (C/EBP), gamma (CEBPG)                           | 7.71  | 6.11  | 2.03  | 2.14  | 0.043 |
| NM_024300 | coiled-coil-helix-coiled-coil-helix domain containing 7 (CHCHD7)                | 15.92 | 18.89 | 7.96  | 10.05 | 0.015 |
| NM_016206 | colon carcinoma related protein                                                 | 3.47  | 3.73  | 5.82  | 8.36  | 0.047 |
| NM_005093 | core-binding factor, runt domain, alpha subunit 2; translocated to, 2 (CBFA2T2) | 5.47  | 3.65  | 3.04  | 2.62  | 0.047 |
| NM_012081 | elongation factor, RNA polymerase II, 2 (ELL2)                                  | 5.53  | 3.82  | 11.26 | 13.18 | 0.022 |
| NM_004098 | empty spiracles homolog 2 (EMX2)                                                | 57.83 | 38.72 | 20.42 | 26.58 | 0.023 |
| NM_015630 | enhancer of polycomb homolog 2 (EPC2)                                           | 27.30 | 17.10 | 12.44 | 10.18 | 0.030 |
| NM_005438 | FOS-like antigen 1 (FOSL1)                                                      | 3.82  | 2.68  | 9.56  | 6.51  | 0.026 |
| NM_199135 | FOXD4-like 2 (FOXD4L2)                                                          | 2.03  | 1.58  | 0.90  | 0.66  | 0.017 |
| NM_032638 | GATA binding protein 2 (GATA2)                                                  | 31.24 | 23.10 | 13.74 | 9.73  | 0.020 |
| NM_005257 | GATA binding protein 6 (GATA6)                                                  | 2.99  | 1.81  | 11.74 | 6.18  | 0.030 |
| NM_173537 | GTF2I repeat domain containing 2 (GTF2IRD2)                                     | 10.59 | 9.45  | 4.12  | 4.05  | 0.026 |
| NM_021973 | heart and neural crest derivatives expressed 2 (HAND2)                          | 26.17 | 33.79 | 12.76 | 27.48 | 0.042 |
| X07290    | HF12 gene                                                                       | 3.02  | 2.49  | 1.65  | 1.41  | 0.050 |
| NM_145904 | high mobility group AT-hook 1 (HMGA1)                                           | 8.07  | 5.41  | 19.52 | 12.31 | 0.023 |
| NM_006037 | histone deacetylase 4 (HDAC4)                                                   | 10.26 | 8.20  | 3.27  | 3.16  | 0.022 |
| NM_006735 | homeo box A2 (HOXA2)                                                            | 2.62  | 1.86  | 1.21  | 1.16  | 0.043 |
| NM_019102 | homeo box A5 (HOXA5)                                                            | 17.75 | 12.70 | 7.17  | 7.35  | 0.038 |
| NM_002147 | homeo box B5 (HOXB5)                                                            | 23.80 | 17.42 | 12.46 | 10.67 | 0.021 |
| NM_002148 | homeo box D10 (HOXD10)                                                          | 30.24 | 25.52 | 11.38 | 10.47 | 0.014 |
| NM_021192 | homeo box D11 (HOXD11)                                                          | 36.34 | 33.54 | 18.87 | 19.50 | 0.031 |
| NM_181358 | homeodomain interacting protein kinase 1 (HIPK1)                                | 3.72  | 2.43  | 2.41  | 1.80  | 0.040 |
| NM_139211 | homeodomain-only protein (HOP)                                                  | 0.53  | 0.58  | 4.23  | 4.65  | 0.050 |
| NM_199072 | I-mfa domain-containing protein (HIC)                                           | 24.86 | 24.35 | 10.17 | 14.52 | 0.018 |
| NM_002167 | inhibitor of DNA binding 3, dominant negative helix-loop-helix protein (ID3)    | 4.93  | 5.10  | 18.37 | 13.45 | 0.018 |
| AF251050  | jerky                                                                           | 7.24  | 6.56  | 3.88  | 3.63  | 0.019 |
| NM_002229 | jun B proto-oncogene (JUNB)                                                     | 3.89  | 3.51  | 8.00  | 6.11  | 0.029 |
| NM_130469 | jun dimerization protein 2 (JDP2)                                               | 56.79 | 40.33 | 22.60 | 24.47 | 0.026 |
| NM_018664 | Jun dimerization protein p21SNFT (SNFT)                                         | 1.04  | 0.94  | 2.47  | 3.29  | 0.026 |
| NM_004235 | Kruppel-like factor 4 (gut) (KLF4)                                              | 48.90 | 58.13 | 6.02  | 12.04 | 0.019 |
| NM_015478 | l(3)mbt-like (Drosophila) (L3MBTL)                                              | 1.78  | 1.78  | 0.89  | 0.91  | 0.012 |
| NM_014583 | LIM and cysteine-rich domains 1 (LMCD1)                                         | 1.34  | 1.12  | 5.13  | 5.86  | 0.020 |
| NM_002397 | MADS box transcription enhancer factor 2, polypeptide C (MEF2C)                 | 2.41  | 1.07  | 1.19  | 1.11  | 0.049 |
| NM_013446 | makorin, ring finger protein, 1 (MKRN1)                                         | 15.47 | 13.14 | 7.97  | 7.91  | 0.035 |
| NM_006800 | male-specific lethal 3-like 1 (MSL3L1)                                          | 8.19  | 6.20  | 3.77  | 2.83  | 0.039 |
| NM_005962 | MAX interactor 1 (MXI1)                                                         | 3.14  | 2.85  | 1.76  | 1.02  | 0.047 |



|           |                                                                                  |       |        |       |       |       |
|-----------|----------------------------------------------------------------------------------|-------|--------|-------|-------|-------|
| NM_004739 | metastasis-associated gene family, member 2 (MTA2)                               | 6.41  | 5.45   | 3.25  | 2.63  | 0.022 |
| NM_006722 | microphthalmia-associated transcription factor (MITF)                            | 11.72 | 11.62  | 3.99  | 5.03  | 0.023 |
| NM_014048 | myocardin-related transcription factor B (MRTF-B)                                | 5.44  | 3.45   | 3.05  | 2.69  | 0.031 |
| NM_006167 | NK3 transcription factor related, locus 1 (NKX3-1)                               | 2.06  | 1.63   | 5.41  | 4.17  | 0.015 |
| NM_003113 | nuclear antigen Sp100 (SP100)                                                    | 5.21  | 3.20   | 3.21  | 2.04  | 0.042 |
| NM_005595 | nuclear factor I/A (NFIA)                                                        | 2.53  | 2.15   | 1.07  | 1.50  | 0.049 |
| L22454    | nuclear respiratory factor-1 (NRF-1)                                             | 2.37  | 1.45   | 1.45  | 1.18  | 0.012 |
| NM_145260 | odd-skipped homolog (ODD)                                                        | 5.02  | 5.20   | 2.11  | 1.98  | 0.034 |
| NM_053001 | odd-skipped-related 2A protein (OSR2)                                            | 90.26 | 113.88 | 8.49  | 9.96  | 0.014 |
| NM_033222 | PC4 and SFRS1 interacting protein 1 (PSIP1)                                      | 9.00  | 5.73   | 5.31  | 4.28  | 0.029 |
| NM_018313 | polybromo 1 (PB1)                                                                | 5.39  | 3.69   | 2.99  | 2.52  | 0.042 |
| NM_020226 | PR domain containing 8 (PRDM8)                                                   | 6.32  | 6.57   | 2.97  | 3.33  | 0.039 |
| NM_020524 | pre-B-cell leukemia transcription factor interacting protein 1 (PBXIP1)          | 25.63 | 19.70  | 13.50 | 12.15 | 0.036 |
| NM_006608 | putative homeodomain transcription factor 1 (PHTF1)                              | 7.54  | 5.67   | 4.74  | 3.58  | 0.040 |
| AK122739  | similar to dHand protein                                                         | 49.62 | 64.33  | 13.82 | 44.46 | 0.012 |
| AA977908  | similar to homeobox protein HOX-D4                                               | 8.32  | 5.99   | 2.59  | 2.39  | 0.022 |
| AK128624  | similar to Zinc finger protein 29                                                | 3.89  | 4.06   | 2.69  | 1.78  | 0.036 |
| R98102    | similar to zinc finger protein 7                                                 | 11.39 | 9.88   | 5.48  | 5.59  | 0.038 |
| AK096536  | similar to zinc finger protein 84                                                | 5.68  | 4.87   | 2.80  | 2.85  | 0.040 |
| AF020276  | spinocerebellar ataxia 7 (SCA7)                                                  | 1.57  | 2.07   | 4.10  | 5.79  | 0.021 |
| NM_003108 | SRY (sex determining region Y)-box 11 (SOX11)                                    | 1.91  | 1.67   | 0.72  | 0.83  | 0.048 |
| NM_006943 | SRY (sex determining region Y)-box 12 (SOX12)                                    | 7.45  | 6.13   | 2.80  | 3.00  | 0.029 |
| NM_003107 | SRY (sex determining region Y)-box 4 (SOX4)                                      | 86.05 | 88.78  | 86.80 | 31.85 | 0.027 |
| NM_005996 | T-box 3 (ulnar mammary syndrome) (TBX3)                                          | 0.87  | 1.15   | 1.75  | 1.90  | 0.024 |
| NM_003195 | transcription elongation factor A (SII), 2 (TCEA2)                               | 24.21 | 20.24  | 12.10 | 13.07 | 0.023 |
| NM_006756 | transcription elongation factor A 1 isoform 1                                    | 63.35 | 50.29  | 26.38 | 26.30 | 0.030 |
| NM_207040 | transcription factor 12 (HTF4, helix-loop-helix transcription factors 4) (TCF12) | 27.12 | 27.01  | 13.72 | 12.39 | 0.022 |
| M77810    | transcription factor GATA-2 (GATA-2)                                             | 2.37  | 1.39   | 1.00  | 0.66  | 0.039 |
| NM_000474 | twist homolog 1 (TWIST1)                                                         | 49.90 | 34.10  | 18.51 | 21.61 | 0.028 |
| NM_020861 | zinc finger and BTB domain containing 2 (ZBTB2)                                  | 9.05  | 5.21   | 4.04  | 3.38  | 0.022 |
| NM_032494 | zinc finger CCCH type domain containing 8 (ZC3HDC8)                              | 3.02  | 2.74   | 1.31  | 1.23  | 0.035 |
| NM_021994 | zinc finger protein (C2H2 type) 277 (ZNF277)                                     | 6.09  | 6.76   | 3.16  | 4.06  | 0.045 |
| NM_018651 | zinc finger protein 167 (ZNF167)                                                 | 2.06  | 1.64   | 1.14  | 0.98  | 0.049 |
| NM_194320 | zinc finger protein 169 (ZNF169)                                                 | 5.53  | 5.46   | 11.37 | 13.10 | 0.022 |
| NM_003451 | zinc finger protein 177 (ZNF177)                                                 | 5.36  | 4.89   | 2.68  | 2.48  | 0.025 |
| NM_201599 | zinc finger protein 261 (ZNF261)                                                 | 7.14  | 4.89   | 2.93  | 2.65  | 0.031 |
| NM_012482 | zinc finger protein 281 (ZNF281)                                                 | 17.90 | 13.84  | 40.49 | 30.98 | 0.038 |
| NM_020843 | zinc finger protein 291 (ZNF291)                                                 | 4.05  | 3.00   | 2.26  | 1.83  | 0.037 |
| NM_005453 | zinc finger protein 297 (ZNF297)                                                 | 8.47  | 6.74   | 4.60  | 3.82  | 0.038 |
| NM_006973 | zinc finger protein 32 (KOX 30) (ZNF32)                                          | 20.16 | 21.49  | 10.34 | 11.40 | 0.042 |

|           |                                                         |       |       |       |       |       |
|-----------|---------------------------------------------------------|-------|-------|-------|-------|-------|
| NM_003407 | zinc finger protein 36, C3H type, homolog (ZFP36)       | 11.10 | 14.77 | 12.26 | 23.19 | 0.047 |
| NM_174945 | zinc finger protein 575 (ZNF575)                        | 23.26 | 16.67 | 6.11  | 8.18  | 0.022 |
| NM_016535 | zinc finger protein 581 (ZNF581)                        | 15.75 | 15.48 | 6.99  | 7.46  | 0.031 |
| BC044615  | zinc finger protein 599                                 | 3.24  | 3.64  | 1.60  | 1.98  | 0.020 |
| NM_020787 | zinc finger protein 624 (ZNF624)                        | 3.25  | 2.61  | 1.58  | 1.71  | 0.024 |
| U17838    | zinc finger protein RIZ mRNA                            | 16.23 | 14.10 | 6.97  | 6.35  | 0.030 |
| NM_006060 | zinc finger protein, subfamily 1A, 1 (Ikaros) (ZNFN1A1) | 2.28  | 3.55  | 4.51  | 3.51  | 0.034 |
| NM_032367 | zinc finger, BED domain containing 3 (ZBED3)            | 6.71  | 5.18  | 1.81  | 1.17  | 0.017 |

### Cytoskeleton

|           |                                                                      |       |       |        |        |       |
|-----------|----------------------------------------------------------------------|-------|-------|--------|--------|-------|
| NM_001101 | actin, beta (ACTB)                                                   | 55.19 | 50.01 | 115.56 | 133.76 | 0.031 |
| NM_005139 | annexin A3 (ANXA3)                                                   | 2.44  | 1.92  | 1.13   | 0.87   | 0.025 |
| NM_021149 | coactosin-like 1 (COTL1)                                             | 2.96  | 2.28  | 6.36   | 4.93   | 0.026 |
| NM_018662 | disrupted in schizophrenia 1 (DISC1)                                 | 5.08  | 2.83  | 3.02   | 2.18   | 0.039 |
| NM_023036 | dynein, axonemal, intermediate polypeptide 2 (DNAI2)                 | 5.60  | 6.07  | 11.29  | 13.79  | 0.019 |
| NM_003462 | dynein, axonemal, light intermediate polypeptide 1 (DNALI1)          | 4.83  | 4.46  | 2.42   | 2.88   | 0.046 |
| NM_015033 | formin binding protein 1 (FNBP1)                                     | 18.84 | 12.50 | 9.00   | 7.78   | 0.017 |
| NM_017415 | kelch-like 3 (KLHL3)                                                 | 9.91  | 8.35  | 2.26   | 5.16   | 0.023 |
| NM_031961 | keratin associated protein 9-2 (KRTAP9-2)                            | 1.48  | 2.39  | 3.40   | 3.35   | 0.034 |
| NM_144722 | KPL2 protein                                                         | 2.08  | 1.60  | 0.63   | 1.25   | 0.039 |
| NM_000426 | laminin, alpha 2 (merosin) (LAMA2)                                   | 5.23  | 6.96  | 1.93   | 2.60   | 0.021 |
| NM_002292 | laminin, beta 2 (laminin S) (LAMB2)                                  | 36.08 | 28.42 | 17.90  | 15.81  | 0.035 |
| NM_178428 | late envelope protein 9 (LEP9)                                       | 1.44  | 1.41  | 5.22   | 4.81   | 0.026 |
| NM_005379 | myosin IA (MYO1A)                                                    | 0.77  | 0.88  | 1.45   | 3.33   | 0.015 |
| NM_013262 | myosin regulatory light chain interacting protein (MYLIP)            | 19.80 | 14.48 | 6.39   | 10.78  | 0.034 |
| NM_002477 | myosin, light polypeptide 5, regulatory (MYL5)                       | 14.01 | 10.89 | 5.20   | 7.94   | 0.033 |
| M80899    | novel protein AHNAK                                                  | 43.20 | 36.31 | 16.25  | 13.81  | 0.021 |
| NM_017668 | nudE nuclear distribution gene E homolog 1(NDE1)                     | 20.54 | 13.78 | 9.51   | 6.97   | 0.034 |
| NM_000231 | sarcoglycan, gamma (35kDa dystrophin-associated glycoprotein) (SGCG) | 8.95  | 9.46  | 3.97   | 4.66   | 0.031 |
| AK128036  | similar to Keratin, type I cytoskeletal 18                           | 19.81 | 6.53  | 43.24  | 15.58  | 0.016 |
| NM_024803 | tubulin, alpha-like 3 (TUBAL3)                                       | 11.47 | 9.44  | 22.55  | 17.58  | 0.012 |
| NM_001069 | tubulin, beta polypeptide (TUBB)                                     | 7.88  | 5.10  | 14.11  | 15.51  | 0.036 |
| NM_178012 | tubulin, beta polypeptide paralog                                    | 1.29  | 1.59  | 2.64   | 1.54   | 0.031 |
| NM_016262 | tubulin, epsilon 1 (TUBE1)                                           | 15.35 | 10.55 | 5.90   | 6.77   | 0.043 |
| NM_017491 | WD repeat domain 1 (WDR1)                                            | 9.78  | 8.88  | 17.92  | 19.24  | 0.026 |

### Defense/Immunity

|           |                                              |        |        |       |       |       |
|-----------|----------------------------------------------|--------|--------|-------|-------|-------|
| NM_203416 | CD163 antigen (CD163)                        | 0.21   | 0.34   | 0.40  | 2.50  | 0.045 |
| NM_020404 | CD164 sialomucin-like 1 (CD164L1)            | 179.27 | 168.40 | 93.02 | 98.92 | 0.015 |
| NM_002985 | chemokine (C-C motif) ligand 5 (CCL5)        | 0.84   | 1.20   | 2.58  | 7.44  | 0.014 |
| NM_006273 | chemokine (C-C motif) ligand 7 (CCL7)        | 3.14   | 1.56   | 9.26  | 8.71  | 0.017 |
| NM_005623 | chemokine (C-C motif) ligand 8 (CCL8)        | 0.28   | 0.71   | 0.90  | 9.40  | 0.036 |
| NM_016557 | chemokine (C-C motif) receptor-like 1 (CCR1) | 1.65   | 0.38   | 8.35  | 2.57  | 0.022 |
| NM_002089 | chemokine (C-X-C motif) ligand 2 (CXCL2)     | 0.28   | 0.11   | 0.91  | 5.40  | 0.035 |

|           |                                                                     |       |      |        |        |       |
|-----------|---------------------------------------------------------------------|-------|------|--------|--------|-------|
| NM_021010 | defensin, alpha 5, Paneth cell-specific (DEFA5)                     | 0.64  | 0.90 | 1.43   | 2.34   | 0.042 |
| NM_005755 | Epstein-Barr virus induced gene 3 (EBI3)                            | 1.75  | 1.76 | 2.77   | 3.96   | 0.019 |
| NM_207585 | interferon (alpha, beta and omega) receptor 2 (IFNAR2)              | 4.16  | 3.01 | 9.86   | 8.30   | 0.014 |
| NM_006332 | interferon, gamma-inducible protein 30 (IFI30)                      | 4.97  | 5.37 | 10.99  | 12.68  | 0.045 |
| NM_001548 | interferon-induced protein with tetratricopeptide repeats 1 (IFIT1) | 12.23 | 8.20 | 5.33   | 3.94   | 0.019 |
| NM_001547 | interferon-induced protein with tetratricopeptide repeats 2 (IFIT2) | 1.55  | 1.02 | 0.85   | 0.62   | 0.042 |
| NM_000576 | interleukin 1, beta (IL1B)                                          | 0.58  | 0.83 | 8.98   | 3.47   | 0.022 |
| NM_000641 | interleukin 11 (IL11)                                               | 0.82  | 0.56 | 1.69   | 0.52   | 0.043 |
| NM_002189 | interleukin 15 receptor, alpha (IL15RA)                             | 2.07  | 2.19 | 9.45   | 7.99   | 0.017 |
| NM_000600 | interleukin 6 (interferon, beta 2) (IL6)                            | 3.19  | 3.39 | 8.51   | 9.24   | 0.022 |
| NM_002185 | interleukin 7 receptor (IL7R)                                       | 2.31  | 2.99 | 7.72   | 12.87  | 0.038 |
| NM_000584 | interleukin 8 (IL8)                                                 | 1.08  | 0.55 | 100.72 | 140.98 | 0.009 |
| NM_001557 | interleukin 8 receptor, beta (IL8RB)                                | 1.17  | 1.04 | 1.90   | 2.47   | 0.026 |
| NM_004221 | natural killer cell transcript 4 (NK4)                              | 3.17  | 2.92 | 51.21  | 46.97  | 0.013 |
| AK094237  | similar to MHC class I chain-related gene A protein                 | 0.81  | 1.71 | 1.77   | 1.49   | 0.023 |
| NM_025217 | UL16 binding protein 2 (ULBP2)                                      | 4.23  | 3.70 | 9.86   | 7.65   | 0.018 |

#### Cell cycle/cell death

|           |                                                              |       |       |        |        |       |
|-----------|--------------------------------------------------------------|-------|-------|--------|--------|-------|
| NM_001731 | B-cell translocation gene 1, anti-proliferative (BTG1)       | 68.77 | 88.78 | 27.08  | 31.19  | 0.031 |
| NM_004282 | BCL2-associated athanogene 2 (BAG2)                          | 25.58 | 33.92 | 11.89  | 13.51  | 0.013 |
| NM_004305 | bridging integrator 1 (BIN1)                                 | 16.01 | 12.18 | 6.76   | 4.76   | 0.025 |
| NM_032996 | caspase 9, apoptosis-related cysteine protease (CASP9)       | 12.26 | 10.05 | 6.06   | 6.11   | 0.024 |
| NM_020739 | cell cycle progression 8 protein (CPR8)                      | 68.36 | 43.35 | 34.58  | 36.48  | 0.025 |
| NM_015076 | cyclin-dependent kinase (CDC2-like) 11 (CDK11)               | 19.62 | 13.58 | 9.09   | 7.78   | 0.030 |
| NM_000076 | cyclin-dependent kinase inhibitor 1C (p57, Kip2) (CDKN1C)    | 52.33 | 61.13 | 22.24  | 33.64  | 0.043 |
| NM_004196 | cyclin-dependent kinase-like 1 (CDC2-related kinase) (CDKL1) | 2.88  | 3.81  | 1.04   | 1.19   | 0.024 |
| NM_001321 | cysteine and glycine-rich protein 2 (CSRP2)                  | 50.84 | 27.88 | 175.90 | 113.55 | 0.025 |
| NM_001343 | disabled homolog 2, mitogen-responsive phosphoprotein (DAB2) | 13.57 | 9.46  | 27.32  | 27.18  | 0.048 |
| NM_019058 | DNA-damage-inducible transcript 4 (DDIT4)                    | 13.06 | 14.83 | 3.45   | 5.24   | 0.036 |
| NM_145244 | DNA-damage-inducible transcript 4-like (DDIT4L)              | 3.19  | 0.77  | 0.85   | 0.54   | 0.014 |
| NM_002048 | growth arrest-specific 1 (GAS1)                              | 3.89  | 5.25  | 1.54   | 5.90   | 0.024 |
| NM_201432 | growth arrest-specific 7 (GAS7)                              | 5.33  | 1.51  | 1.43   | 1.11   | 0.022 |
| NM_003897 | immediate early response 3 (IER3)                            | 29.64 | 11.80 | 90.72  | 51.46  | 0.019 |
| NM_022477 | NDRG family member 3 (NDRG3)                                 | 19.16 | 16.13 | 9.58   | 8.93   | 0.043 |
| NM_032510 | par-6 partitioning defective 6 homolog gamma (PAR6G)         | 7.52  | 5.46  | 4.55   | 3.61   | 0.047 |
| NM_003311 | pleckstrin homology-like domain A2 (PHLDA2)                  | 9.98  | 6.70  | 24.02  | 19.39  | 0.037 |
| NM_025239 | programmed cell death 1 ligand 2 (PDCD1LG2)                  | 4.37  | 3.80  | 14.39  | 9.56   | 0.045 |
| NM_145341 | programmed cell death 4 (PDCD4)                              | 9.42  | 10.28 | 4.00   | 3.97   | 0.014 |
| NM_002727 | proteoglycan 1, secretory granule (PRG1)                     | 34.21 | 38.90 | 89.03  | 119.66 | 0.014 |

|                             |                                                                            |        |        |       |       |       |
|-----------------------------|----------------------------------------------------------------------------|--------|--------|-------|-------|-------|
| NM_015714                   | putative lymphocyte G0/G1 switch gene (G0S2)                               | 2.45   | 8.95   | 17.54 | 30.77 | 0.017 |
| NM_031459                   | sestrin 2 (SESN2)                                                          | 11.06  | 7.98   | 5.42  | 4.76  | 0.037 |
| H25717                      | similar to growth arrest and DNA-damage-inducible protein GADD153          | 4.73   | 3.54   | 1.75  | 1.81  | 0.013 |
| NM_006542                   | S-phase response (cyclin-related) (SPHAR)                                  | 13.93  | 12.92  | 6.94  | 7.10  | 0.023 |
| NM_025188                   | tripartite motif-containing 45 (TRIM45)                                    | 8.12   | 5.89   | 2.13  | 2.33  | 0.010 |
| NM_033285                   | tumor protein p53 inducible nuclear protein 1 (TP53INP1)                   | 36.91  | 31.72  | 17.17 | 14.06 | 0.026 |
| NM_017523                   | XIAP associated factor-1 (HSXIAPAF1)                                       | 12.32  | 10.18  | 5.26  | 3.96  | 0.032 |
| <b>Adhesion</b>             |                                                                            |        |        |       |       |       |
| NM_181847                   | amphoterin induced gene 2 (AMIGO2)                                         | 1.43   | 0.92   | 16.42 | 9.25  | 0.013 |
| NM_032457                   | BH-protocadherin (PCDH7)                                                   | 7.19   | 4.34   | 1.95  | 2.80  | 0.044 |
| NM_014343                   | claudin 15 (CLDN15)                                                        | 2.47   | 1.90   | 1.06  | 1.21  | 0.049 |
| NM_005545                   | immunoglobulin superfamily containing leucine-rich repeat (ISLR)           | 9.72   | 5.89   | 2.34  | 1.83  | 0.012 |
| NM_181501                   | integrin, alpha 1 (ITGA1)                                                  | 7.49   | 6.90   | 25.69 | 14.98 | 0.034 |
| NM_000210                   | integrin, alpha 6 (ITGA6)                                                  | 107.58 | 43.75  | 22.27 | 17.87 | 0.027 |
| NM_014599                   | melanoma antigen, family D, 2 (MAGED2)                                     | 123.37 | 114.41 | 69.81 | 63.21 | 0.016 |
| NM_138970                   | neurexin 3 (NRXN3)                                                         | 9.23   | 22.75  | 28.02 | 30.34 | 0.037 |
| NM_016522                   | neurotrimin (HNT)                                                          | 2.59   | 1.10   | 7.32  | 3.12  | 0.032 |
| NM_005014                   | osteomodulin (OMD)                                                         | 3.75   | 14.94  | 1.43  | 2.75  | 0.018 |
| NM_032961                   | protocadherin 10 (PCDH10)                                                  | 4.63   | 2.58   | 2.20  | 1.87  | 0.044 |
| NM_203487                   | protocadherin 9 (PCDH9)                                                    | 2.24   | 1.35   | 0.52  | 0.42  | 0.027 |
| NM_018931                   | protocadherin beta 11 (PCDHB11)                                            | 3.39   | 3.00   | 2.07  | 1.67  | 0.037 |
| NM_019119                   | protocadherin beta 9 (PCDHB9)                                              | 3.81   | 3.76   | 2.28  | 1.73  | 0.035 |
| NM_033130                   | sialic acid binding Ig-like lectin 10 (SIGLEC10)                           | 1.52   | 1.44   | 2.65  | 3.52  | 0.021 |
| AK091292                    | similar to cadherin-related tumor suppressor precursor                     | 32.63  | 24.43  | 10.25 | 12.83 | 0.027 |
| U60115                      | skeletal muscle LIM-protein FHL1                                           | 26.26  | 30.50  | 7.67  | 11.96 | 0.020 |
| NM_016157                   | trophinin (TRO), transcript variant 3                                      | 14.46  | 9.58   | 7.13  | 5.00  | 0.026 |
| <b>Extracellular matrix</b> |                                                                            |        |        |       |       |       |
| NM_017680                   | asporin (LRR class 1) (ASPN)                                               | 6.67   | 13.07  | 1.36  | 3.00  | 0.022 |
| NM_001276                   | chitinase 3-like 1 (cartilage glycoprotein-39) (CHI3L1)                    | 2.43   | 2.49   | 4.17  | 6.97  | 0.032 |
| NM_004000                   | chitinase 3-like 2 (CHI3L2)                                                | 0.75   | 1.28   | 2.31  | 35.67 | 0.030 |
| NM_080806                   | collagen, type XIII, alpha 1 (COL13A1)                                     | 4.61   | 2.27   | 16.15 | 8.89  | 0.015 |
| NM_052846                   | elastin microfibril interfacier 3 (EMILIN3)                                | 1.14   | 2.02   | 0.86  | 3.54  | 0.026 |
| NM_001393                   | extracellular matrix protein 2, female organ and adipocyte specific (ECM2) | 6.48   | 9.14   | 2.32  | 3.47  | 0.019 |
| Y11711                      | Extracellular matrix protein collagen type XIV                             | 32.45  | 41.95  | 10.33 | 13.75 | 0.024 |
| NM_005558                   | laminin 1 (LAD1)                                                           | 4.88   | 4.84   | 8.18  | 9.65  | 0.026 |
| NM_018192                   | leprecan-like 1 (LEPREL1)                                                  | 1.52   | 1.06   | 9.88  | 4.28  | 0.046 |
| NM_153267                   | MAM domain containing 2 (MAMDC2)                                           | 6.07   | 19.23  | 2.42  | 3.28  | 0.013 |
| NM_030583                   | matrilin 2 (MATN2)                                                         | 42.96  | 83.10  | 17.87 | 36.53 | 0.021 |
| NM_002381                   | matrilin 3 (MATN3)                                                         | 2.82   | 2.95   | 1.37  | 1.61  | 0.037 |
| NM_000900                   | matrix Gla protein (MGP)                                                   | 1.29   | 6.24   | 8.95  | 11.36 | 0.024 |
| NM_002404                   | microfibrillar-associated protein 4 (MFAP4)                                | 94.69  | 58.40  | 50.00 | 34.54 | 0.025 |
| NM_032536                   | netrin G2 (NTNG2)                                                          | 2.64   | 2.49   | 1.15  | 1.16  | 0.015 |
| NM_182487                   | olfactomedin-like 2A (OLFML2A)                                             | 24.84  | 15.30  | 11.57 | 9.35  | 0.034 |

|                            |                                                                                          |        |        |        |        |       |
|----------------------------|------------------------------------------------------------------------------------------|--------|--------|--------|--------|-------|
| NM_015441                  | olfactomedin-like 2B (OLFML2B)                                                           | 19.96  | 31.06  | 16.61  | 8.98   | 0.023 |
| NM_020190                  | olfactomedin-like 3 (OLFML3)                                                             | 25.72  | 23.22  | 11.11  | 12.15  | 0.027 |
| NM_002160                  | tenascin C (hexabrachion) (TNC)                                                          | 4.71   | 4.70   | 49.13  | 31.24  | 0.014 |
| <b>Angiogenesis</b>        |                                                                                          |        |        |        |        |       |
| NM_133265                  | angiomin (AMOT)                                                                          | 13.35  | 13.52  | 2.03   | 1.89   | 0.010 |
| NM_139314                  | angiopoietin-like 4 (ANGPTL4)                                                            | 8.90   | 6.47   | 0.97   | 0.96   | 0.019 |
| NM_001704                  | brain-specific angiogenesis inhibitor 3 (BAI3)                                           | 2.23   | 4.01   | 0.24   | 0.61   | 0.037 |
| NM_001554                  | cysteine-rich, angiogenic inducer, 61 (CYR61)                                            | 31.23  | 17.92  | 149.33 | 118.08 | 0.017 |
| <b>Translation</b>         |                                                                                          |        |        |        |        |       |
| NM_003732                  | eukaryotic translation initiation factor 4E binding protein 3 (EIF4EBP3)                 | 4.63   | 5.88   | 1.27   | 2.00   | 0.027 |
| NM_183004                  | eukaryotic translation initiation factor 5 (EIF5)                                        | 29.16  | 22.64  | 19.09  | 12.26  | 0.024 |
| NM_005801                  | putative translation initiation factor (SUI1)                                            | 206.11 | 198.03 | 106.22 | 124.00 | 0.033 |
| <b>Oxidation/Reduction</b> |                                                                                          |        |        |        |        |       |
| NM_001752                  | catalase (CAT)                                                                           | 3.88   | 6.22   | 1.35   | 1.79   | 0.030 |
| NM_005952                  | metallothionein 1X (MT1X)                                                                | 43.17  | 50.05  | 67.57  | 140.74 | 0.041 |
| NM_016931                  | NADPH oxidase 4 (NOX4)                                                                   | 1.89   | 1.21   | 4.09   | 1.00   | 0.036 |
| NM_181354                  | oxidation resistance 1 (OXR1)                                                            | 16.38  | 11.90  | 8.84   | 6.39   | 0.045 |
| NM_005410                  | selenoprotein P, plasma, 1 (SEPP1)                                                       | 1.88   | 2.13   | 0.97   | 0.99   | 0.045 |
| NM_000636                  | superoxide dismutase 2, mitochondrial (SOD2)                                             | 2.84   | 2.75   | 42.05  | 76.32  | 0.009 |
| NM_004881                  | tumor protein p53 inducible protein 3 (TP53I3)                                           | 11.26  | 9.73   | 37.55  | 10.02  | 0.022 |
| <b>Proteoglycans</b>       |                                                                                          |        |        |        |        |       |
| NM_004385                  | chondroitin sulfate proteoglycan 2 (versican) (CSPG2)                                    | 4.12   | 3.79   | 10.66  | 7.12   | 0.049 |
| NM_004950                  | dermatan sulfate proteoglycan 3 (DSPG3)                                                  | 1.83   | 0.98   | 1.02   | 0.76   | 0.036 |
| NM_173462                  | papilin, proteoglycan-like sulfated glycoprotein (PAPLN)                                 | 1.20   | 10.42  | 0.51   | 3.21   | 0.018 |
| NM_002998                  | syndecan 2 (heparan sulfate proteoglycan 1, cell surface-associated, fibroglycan) (SDC2) | 37.82  | 17.66  | 11.54  | 10.39  | 0.042 |
| <b>Chaperonins</b>         |                                                                                          |        |        |        |        |       |
| NM_014109                  | ATPase family, AAA domain containing 2 (ATAD2)                                           | 6.01   | 3.66   | 12.16  | 8.85   | 0.037 |
| NM_005345                  | heat shock 70kDa protein 1A (HSPA1A)                                                     | 37.65  | 24.13  | 18.61  | 20.04  | 0.024 |
| BC063507                   | heat shock 70kDa protein 1B                                                              | 38.77  | 28.71  | 17.56  | 18.69  | 0.041 |
| NM_021979                  | heat shock 70kDa protein 2 (HSPA2)                                                       | 5.24   | 5.36   | 4.59   | 14.08  | 0.012 |
| NM_017870                  | heat shock 70kDa protein 5 binding protein 1 (HSPA5BP1)                                  | 3.21   | 2.66   | 8.78   | 4.65   | 0.037 |
| BC050602                   | histone 1, H2ac                                                                          | 22.24  | 28.18  | 4.95   | 6.45   | 0.023 |
| NM_003509                  | histone 1, H2ai (HIST1H2AI)                                                              | 8.97   | 9.82   | 3.18   | 3.30   | 0.021 |
| NM_021063                  | histone 1, H2bd (HIST1H2BD)                                                              | 10.93  | 13.04  | 2.28   | 2.38   | 0.013 |
| NM_018848                  | McKusick-Kaufman syndrome (MKKS)                                                         | 9.44   | 6.76   | 4.88   | 4.86   | 0.041 |
| <b>Ubiquitin system</b>    |                                                                                          |        |        |        |        |       |
| NM_012304                  | F-box and leucine-rich repeat protein 7 (FBXL7)                                          | 15.10  | 12.65  | 6.10   | 7.06   | 0.041 |
| NM_024907                  | F-box protein 17 (FBXO17)                                                                | 12.52  | 9.25   | 6.26   | 6.13   | 0.031 |

|                          |                                                                   |        |        |       |       |       |
|--------------------------|-------------------------------------------------------------------|--------|--------|-------|-------|-------|
| NM_183420                | F-box protein 25 (FBXO25)                                         | 11.88  | 11.05  | 5.71  | 5.15  | 0.031 |
| NM_183413                | F-box protein 44 (FBXO44)                                         | 6.01   | 4.39   | 3.28  | 3.03  | 0.034 |
| NM_018434                | ring finger protein 130 (RNF130)                                  | 34.68  | 32.68  | 15.72 | 20.25 | 0.021 |
| NM_007212                | ring finger protein 2 (RNF2)                                      | 20.87  | 17.30  | 12.30 | 10.40 | 0.035 |
| NM_030936                | ring finger protein 32 (RNF32)                                    | 1.10   | 1.77   | 0.26  | 0.61  | 0.041 |
| NM_032236                | ubiquitin specific protease 48 (USP48)                            | 41.90  | 27.68  | 25.59 | 21.29 | 0.032 |
| NM_006357                | ubiquitin-conjugating enzyme E2E 3 (UBE2E3)                       | 90.53  | 63.71  | 39.55 | 33.73 | 0.022 |
| NM_013282                | ubiquitin-like, containing PHD and RING finger domains, 1 (UHRF1) | 0.59   | 0.49   | 1.27  | 0.96  | 0.038 |
| <b>Lipid metabolism</b>  |                                                                   |        |        |       |       |       |
| NM_001122                | adipose differentiation-related protein (ADFP)                    | 20.13  | 27.78  | 8.24  | 14.09 | 0.022 |
| NM_001645                | apolipoprotein C-I (APOC1)                                        | 4.95   | 5.94   | 1.94  | 3.54  | 0.029 |
| NM_000041                | apolipoprotein E (APOE)                                           | 7.63   | 11.44  | 3.60  | 6.06  | 0.049 |
| NM_001638                | apolipoprotein F (APOF)                                           | 0.81   | 0.90   | 1.62  | 2.38  | 0.036 |
| NM_019101                | apolipoprotein M (APOM)                                           | 2.95   | 3.05   | 1.47  | 1.79  | 0.036 |
| NM_030637                | DDHD domain containing 1 (DDHD1)                                  | 4.27   | 3.57   | 2.27  | 1.99  | 0.027 |
| NM_001442                | fatty acid binding protein 4, adipocyte (FABP4)                   | 15.19  | 6.41   | 7.14  | 12.85 | 0.018 |
| NM_001444                | fatty acid binding protein 5 (psoriasis-associated) (FABP5)       | 16.77  | 9.86   | 8.14  | 9.63  | 0.038 |
| NM_203463                | LAG1 longevity assurance homolog 6 (LASS6)                        | 9.74   | 14.06  | 4.91  | 9.20  | 0.016 |
| NM_005779                | lipoma HMGIC fusion partner-like 2 (LHFPL2)                       | 38.68  | 22.41  | 16.13 | 11.47 | 0.012 |
| NM_000527                | low density lipoprotein receptor (LDLR)                           | 23.86  | 15.32  | 45.03 | 63.01 | 0.013 |
| NM_002543                | oxidised low density lipoprotein (lectin-like) receptor 1 (OLR1)  | 1.22   | 0.91   | 4.96  | 3.89  | 0.033 |
| NM_017784                | oxysterol binding protein-like 10 (OSBPL10)                       | 3.58   | 2.53   | 1.53  | 1.39  | 0.036 |
| W01427                   | similar to apolipoprotein AI regulatory protein-1                 | 7.98   | 4.73   | 4.35  | 3.70  | 0.022 |
| <b>Membrane proteins</b> |                                                                   |        |        |       |       |       |
| NM_153000                | adenomatous polyposis coli down-regulated 1 (APCDD1)              | 3.59   | 7.29   | 0.60  | 5.04  | 0.039 |
| NM_197974                | butyrophilin, subfamily 3, member A3 (BTN3A3)                     | 9.22   | 6.60   | 4.46  | 3.20  | 0.029 |
| NM_015416                | cervical cancer 1 protooncogene (HCCR1)                           | 15.06  | 17.37  | 7.57  | 8.56  | 0.042 |
| NM_001410                | EGF-like-domain, multiple 4 (EGFL4)                               | 9.94   | 7.58   | 4.98  | 4.70  | 0.044 |
| NM_030652                | EGF-like-domain, multiple 8 (EGFL8)                               | 3.09   | 2.53   | 1.38  | 1.39  | 0.045 |
| NM_005512                | glycoprotein A repetitions predominant (GARP)                     | 1.77   | 1.40   | 4.70  | 4.33  | 0.029 |
| NM_002231                | kangai 1 (CD82 antigen) (KAI1)                                    | 4.85   | 5.31   | 13.03 | 11.14 | 0.037 |
| NM_002306                | lectin, galactoside-binding, soluble, 3 (galectin 3) (LGALS3)     | 146.90 | 106.18 | 72.18 | 91.30 | 0.033 |
| NM_153377                | leucine-rich repeats and immunoglobulin-like domains 3 (LRIG3)    | 14.35  | 11.57  | 7.43  | 9.95  | 0.026 |
| NM_020962                | likely ortholog of mouse neighbor of Punc E11 (NOPE)              | 6.73   | 4.77   | 3.61  | 2.59  | 0.039 |
| NM_052858                | MARVEL (membrane-associating) domain containing 3 (MRVLDC3)       | 1.50   | 1.55   | 2.88  | 3.09  | 0.037 |
| NM_032623                | ovary-specific acidic protein (OSAP)                              | 19.93  | 10.39  | 8.97  | 6.58  | 0.022 |
| NM_022361                | popeye domain containing 3 (POPDC3)                               | 3.05   | 3.24   | 7.24  | 7.48  | 0.026 |
| NM_006054                | reticulon 3 (RTN3)                                                | 21.23  | 17.94  | 9.71  | 8.79  | 0.033 |
| AA463818                 | similar to 14 KDA transmembrane protein                           | 1.19   | 1.70   | 5.54  | 8.70  | 0.011 |

|                                    |                                                                                    |       |       |       |       |       |
|------------------------------------|------------------------------------------------------------------------------------|-------|-------|-------|-------|-------|
| NM_003156                          | stromal interaction molecule 1 (STIM1)                                             | 49.27 | 73.03 | 23.41 | 26.48 | 0.019 |
| NM_004711                          | synaptogyrin 1 (SYNGR1)                                                            | 7.68  | 6.13  | 3.54  | 3.67  | 0.026 |
| NM_014220                          | transmembrane 4 superfamily member 1 (TM4SF1)                                      | 5.60  | 3.46  | 28.22 | 10.18 | 0.022 |
| NM_014051                          | transmembrane protein 14A (TMEM14A)                                                | 30.32 | 31.03 | 12.56 | 18.06 | 0.013 |
| NM_198276                          | transmembrane protein 17 (TMEM17)                                                  | 11.49 | 10.43 | 4.39  | 5.62  | 0.026 |
| NM_013390                          | transmembrane protein 2 (TMEM2)                                                    | 5.16  | 3.97  | 16.91 | 11.99 | 0.017 |
| <b>Protein-protein interaction</b> |                                                                                    |       |       |       |       |       |
| NM_032548                          | ankyrin repeat and BTB (POZ) domain containing 1 (ABTB1)                           | 2.59  | 2.03  | 1.28  | 0.99  | 0.043 |
| NM_005824                          | leucine rich repeat containing 17 (LRRC17)                                         | 32.47 | 36.57 | 9.00  | 3.08  | 0.012 |
| NM_024512                          | leucine rich repeat containing 2 (LRRC2)                                           | 4.05  | 2.93  | 14.77 | 10.59 | 0.031 |
| NM_020956                          | periaxin (PRX)                                                                     | 6.17  | 5.00  | 2.32  | 2.24  | 0.029 |
| NM_014575                          | schwannomin interacting protein 1 (SCHIP1)                                         | 1.11  | 0.49  | 3.67  | 1.71  | 0.014 |
| NM_012477                          | WW domain binding protein 1 (WBP1)                                                 | 31.18 | 31.28 | 14.25 | 14.82 | 0.018 |
| <b>Vesicle trafficking</b>         |                                                                                    |       |       |       |       |       |
| NM_012133                          | coatamer protein complex, subunit gamma 2 (COPG2)                                  | 5.55  | 4.68  | 2.16  | 3.05  | 0.042 |
| NM_015219                          | exocyst complex component 7 (EXOC7)                                                | 73.09 | 50.37 | 40.88 | 38.22 | 0.035 |
| NM_005803                          | flotillin 1 (FLOT1)                                                                | 36.36 | 31.07 | 18.41 | 23.83 | 0.048 |
| NM_152540                          | sec1 family domain containing 2 (SCFD2)                                            | 11.52 | 12.50 | 25.00 | 21.95 | 0.028 |
| <b>Nucleic acid regulation</b>     |                                                                                    |       |       |       |       |       |
| NM_030594                          | cytoplasmic polyadenylation element binding protein 1 (CPEB1)                      | 7.45  | 7.12  | 5.24  | 2.43  | 0.031 |
| NM_133636                          | DNA helicase HEL308 (HEL308)                                                       | 2.90  | 2.90  | 1.49  | 1.39  | 0.037 |
| NM_003685                          | KH-type splicing regulatory protein (FUSE binding protein 2) (KHSRP)               | 7.09  | 5.37  | 2.40  | 2.04  | 0.016 |
| NM_032485                          | MCM8 minichromosome maintenance deficient 8 (MCM8)                                 | 7.68  | 0.72  | 1.98  | 1.57  | 0.037 |
| AA741024                           | similar to small nuclear ribonucleoprotein C                                       | 2.64  | 2.26  | 1.06  | 1.28  | 0.042 |
| AK057417                           | similar to synaptonemal complex protein 1                                          | 1.84  | 2.15  | 3.05  | 4.35  | 0.041 |
| NM_005870                          | sin3-associated polypeptide, 18kDa (SAP18)                                         | 12.27 | 11.19 | 6.34  | 6.77  | 0.029 |
| NM_018070                          | single stranded DNA binding protein 3 (SSBP3)                                      | 6.28  | 7.47  | 2.62  | 4.40  | 0.041 |
| NM_012239                          | sirtuin (silent mating type information regulation 2 homolog) 3 (SIRT3)            | 7.16  | 7.63  | 3.53  | 4.28  | 0.026 |
| NM_006275                          | splicing factor, arginine/serine-rich 6 (SFRS6)                                    | 15.53 | 11.82 | 8.60  | 7.18  | 0.037 |
| NM_022090                          | transposon-derived Buster3 transposase-like UPF3 regulator of nonsense transcripts | 2.09  | 2.08  | 1.04  | 1.13  | 0.034 |
| NM_023010                          | homolog B (UPF3B)                                                                  | 6.22  | 4.15  | 3.50  | 2.79  | 0.042 |
| NM_000553                          | Werner syndrome (WRN)                                                              | 4.74  | 3.01  | 3.10  | 2.32  | 0.040 |
| <b>Enzymes/Metabolism</b>          |                                                                                    |       |       |       |       |       |
| NM_032592                          | 1-aminocyclopropane-1-carboxylate synthase (PHACS)                                 | 14.32 | 14.19 | 4.50  | 7.21  | 0.014 |
| NM_006187                          | 2'-5'-oligoadenylate synthetase 3, 100kDa (OAS3)                                   | 2.67  | 4.08  | 7.15  | 12.53 | 0.041 |
| NM_014362                          | 3-hydroxyisobutyryl-Coenzyme A hydrolase (HIBCH)                                   | 20.97 | 14.06 | 8.65  | 9.11  | 0.017 |
| NM_003500                          | acyl-Coenzyme A oxidase 2, branched chain                                          | 13.83 | 13.65 | 5.52  | 7.60  | 0.049 |

|              |                                                                    |        |       |        |        |       |
|--------------|--------------------------------------------------------------------|--------|-------|--------|--------|-------|
|              | (ACOX2)                                                            |        |       |        |        |       |
| NM_015833    | adenosine deaminase, RNA-specific, B1 (ADARB1)                     | 7.70   | 9.99  | 17.32  | 26.79  | 0.024 |
| NM_000480    | adenosine monophosphate deaminase (isoform E) (AMPD3)              | 10.59  | 7.86  | 43.37  | 38.54  | 0.017 |
| NM_013410    | adenylate kinase 3 (AK3)                                           | 0.76   | 1.00  | 1.27   | 1.91   | 0.014 |
| NM_024758    | agmatine ureohydrolase (agmatinase) (AGMAT)                        | 0.85   | 0.71  | 1.46   | 1.97   | 0.030 |
| NM_000692    | aldehyde dehydrogenase 1 family, member B1 (ALDH1B1)               | 1.95   | 1.66  | 5.71   | 5.48   | 0.012 |
| NM_000382    | aldehyde dehydrogenase 3 family, member A2 (ALDH3A2)               | 2.39   | 2.56  | 0.97   | 1.23   | 0.029 |
| NM_001159    | aldehyde oxidase 1 (AOX1)                                          | 6.61   | 38.23 | 3.26   | 10.41  | 0.012 |
| NM_020978    | amylase, alpha 2B; pancreatic (AMY2B)                              | 2.07   | 2.26  | 0.79   | 1.05   | 0.035 |
| NM_000050    | argininosuccinate synthetase (ASS)                                 | 26.39  | 32.10 | 6.07   | 14.56  | 0.022 |
| NM_001218    | carbonic anhydrase XII (CA12)                                      | 2.55   | 2.31  | 5.38   | 9.31   | 0.022 |
| AJ578034     | chondroitin synthase 2 (CHSY2)                                     | 1.45   | 1.26  | 2.38   | 3.36   | 0.038 |
| NM_206808    | citrate lyase beta like (CLYBL)                                    | 1.41   | 2.06  | 0.39   | 0.91   | 0.042 |
| NM_001905    | CTP synthase (CTPS)                                                | 9.26   | 5.11  | 18.41  | 12.81  | 0.017 |
| NM_000791    | dihydrofolate reductase (DHFR)                                     | 7.64   | 5.61  | 14.12  | 14.53  | 0.049 |
| NM_012137    | dimethylarginine dimethylaminohydrolase 1 (DDAH1)                  | 16.15  | 11.29 | 44.77  | 40.60  | 0.024 |
| NM_013974    | dimethylarginine dimethylaminohydrolase 2 (DDAH2)                  | 1.50   | 1.41  | 0.69   | 0.52   | 0.046 |
|              | ectonucleotide pyrophosphatase/phosphodiesterase 1 (ENPP1)         | 5.44   | 9.44  | 1.39   | 1.82   | 0.016 |
| NM_006208    | enolase 3, (beta, muscle) (ENO3)                                   | 4.77   | 5.64  | 2.14   | 2.32   | 0.033 |
| NM_001976    | enoyl Coenzyme A hydratase 1, peroxisomal (ECH1)                   | 35.78  | 32.53 | 14.98  | 17.68  | 0.025 |
| NM_001398    | exostoses (multiple)-like 2 (EXTL2)                                | 49.72  | 34.14 | 25.01  | 20.55  | 0.050 |
| NM_001439    | fructose-1,6-bisphosphatase 1 (FBP1)                               | 2.44   | 2.98  | 4.89   | 4.29   | 0.037 |
| NM_000507    | fumarylacetoacetate hydrolase (fumarylacetoacetase) (FAH)          | 6.36   | 12.27 | 5.65   | 14.81  | 0.022 |
| NM_000137    | galactokinase 2 (GALK2)                                            | 4.57   | 5.19  | 7.56   | 9.75   | 0.036 |
| NM_001001556 | gamma-glutamyltransferase-like activity 1 (GGTLA1)                 | 0.95   | 1.37  | 3.41   | 5.01   | 0.036 |
| NM_004121    | glutamate-ammonia ligase (glutamine synthase) (GLUL)               | 37.91  | 60.66 | 29.80  | 79.23  | 0.019 |
| NM_002065    | glutamic pyruvate transaminase (alanine aminotransferase) 2 (GPT2) | 7.45   | 7.13  | 3.83   | 3.20   | 0.031 |
| NM_133443    | glycerol kinase (GK)                                               | 1.17   | 0.72  | 5.12   | 5.85   | 0.011 |
| NM_000167    | glycine C-acetyltransferase (GCAT)                                 | 2.25   | 1.93  | 3.59   | 4.52   | 0.019 |
| NM_014291    | glycyl-tRNA synthetase (GARS)                                      | 109.38 | 95.52 | 51.81  | 54.23  | 0.036 |
| NM_002047    | hexokinase 2 (HK2)                                                 | 1.96   | 1.39  | 7.00   | 5.65   | 0.022 |
| NM_000189    | kraken-like kynureninase (L-kynurenine hydrolase) (KYNU)           | 0.43   | 0.75  | 1.16   | 1.94   | 0.020 |
| NM_004121    | lactase (LCT)                                                      | 1.69   | 2.05  | 3.43   | 4.47   | 0.039 |
| NM_003937    | lactate dehydrogenase A (LDHA)                                     | 75.36  | 82.17 | 170.01 | 218.07 | 0.017 |
| NM_002299    | lipoic acid synthetase (LIAS)                                      | 13.29  | 16.22 | 5.40   | 5.70   | 0.015 |
| NM_005566    | lysyl oxidase (LOX)                                                | 63.09  | 68.20 | 125.28 | 93.18  | 0.030 |
| NM_006859    | mesoderm specific transcript homolog (MEST)                        | 14.35  | 5.56  | 2.13   | 0.99   | 0.026 |
| NM_002317    |                                                                    |        |       |        |        |       |
| NM_002402    |                                                                    |        |       |        |        |       |



|           |                                                                                   |       |       |        |        |       |
|-----------|-----------------------------------------------------------------------------------|-------|-------|--------|--------|-------|
| NM_052963 | mitochondrial topoisomerase I (TOP1MT)                                            | 9.56  | 7.01  | 3.61   | 4.88   | 0.037 |
| NM_007283 | monoglyceride lipase (MGLL)                                                       | 45.03 | 26.13 | 109.79 | 92.44  | 0.030 |
| NM_016256 | N-acetylglucosamine-1-phosphodiester alpha-N-acetylglucosaminidase (NAGPA)        | 31.47 | 31.17 | 15.28  | 18.56  | 0.047 |
| NM_000903 | NAD(P)H dehydrogenase, quinone 1 (NQO1)                                           | 7.12  | 4.96  | 3.29   | 3.90   | 0.041 |
| NM_175614 | NADH dehydrogenase (ubiquinone) 1 alpha subcomplex, 11, 147kDa (NDUFA11)          | 2.23  | 2.37  | 1.15   | 1.14   | 0.026 |
| NM_006169 | nicotinamide N-methyltransferase (NNMT) non-metastatic cells 1, protein (NM23A)   | 57.83 | 88.96 | 325.79 | 461.39 | 0.014 |
| NM_000269 | expressed in (NME1) phosphatidylethanolamine N-methyltransferase (PEMT)           | 19.05 | 14.82 | 37.70  | 32.03  | 0.014 |
| NM_007169 | methyltransferase (PEMT)                                                          | 14.11 | 27.04 | 9.01   | 13.43  | 0.014 |
| NM_014338 | phosphatidylserine decarboxylase (PISD)                                           | 6.53  | 11.49 | 6.19   | 15.79  | 0.029 |
| NM_006623 | phosphoglycerate dehydrogenase (PHGDH)                                            | 15.69 | 13.06 | 3.52   | 4.19   | 0.050 |
| NM_002767 | phosphoribosyl pyrophosphate synthetase-associated protein 2 (PRPSAP2)            | 5.65  | 4.88  | 3.07   | 2.56   | 0.039 |
| NM_020200 | phosphoribosyl transferase domain containing 1 (PRTFDC1)                          | 3.45  | 3.09  | 1.73   | 1.48   | 0.032 |
| NM_002863 | phosphorylase, glycogen; liver (PYGL)                                             | 19.91 | 28.09 | 7.52   | 8.26   | 0.020 |
| NM_005746 | pre-B-cell colony enhancing factor 1 (PBEF1)                                      | 3.09  | 3.49  | 10.30  | 21.98  | 0.019 |
| NM_016297 | prenylcysteine oxidase 1 (PCYOX1)                                                 | 25.86 | 25.26 | 8.93   | 10.47  | 0.013 |
| NM_000947 | primase, polypeptide 2A, 58kDa (PRIM2A)                                           | 13.67 | 8.47  | 8.44   | 6.22   | 0.029 |
| NM_000935 | procollagen-lysine, 2-oxoglutarate 5-dioxygenase 2 (PLOD2)                        | 1.54  | 1.42  | 5.21   | 3.55   | 0.041 |
| NM_002611 | pyruvate dehydrogenase kinase, isoenzyme 2 (PDK2)                                 | 5.46  | 4.04  | 2.23   | 1.85   | 0.031 |
| NM_194431 | ribonuclease, RNase A family, 4 (RNASE4)                                          | 7.06  | 10.09 | 3.40   | 4.44   | 0.026 |
| NM_001033 | ribonucleotide reductase M1 polypeptide (RRM1)                                    | 2.86  | 2.11  | 5.86   | 4.76   | 0.029 |
| NM_001034 | ribonucleotide reductase M2 polypeptide (RRM2)                                    | 8.63  | 5.86  | 20.38  | 15.89  | 0.049 |
| NM_170694 | serine hydrolase-like (SERHL)                                                     | 1.69  | 1.90  | 3.11   | 3.58   | 0.022 |
| NM_006513 | seryl-tRNA synthetase (SARS)                                                      | 47.77 | 37.81 | 21.45  | 17.95  | 0.031 |
| NM_030965 | sialyltransferase 7E (SIAT7E)                                                     | 7.95  | 8.17  | 18.40  | 18.11  | 0.048 |
| W67378    | similar to aldehyde dehydrogenase, mitochondrial precursor                        | 3.44  | 3.25  | 1.02   | 2.03   | 0.024 |
| NM_198519 | similar to Cytochrome c, somatic similar to Pre-B cell enhancing factor precursor | 6.07  | 5.86  | 2.25   | 3.39   | 0.049 |
| AK023341  | precursor                                                                         | 1.56  | 1.73  | 4.32   | 5.76   | 0.034 |
| NM_019025 | spermine oxidase (SMOX)                                                           | 6.00  | 5.36  | 2.69   | 2.48   | 0.010 |
| NM_013352 | squamous cell carcinoma antigen recognized by T cells 2 (SART2)                   | 7.79  | 5.14  | 17.76  | 10.86  | 0.022 |
| NM_015170 | sulfatase 1 (SULF1)                                                               | 48.95 | 23.19 | 137.63 | 53.03  | 0.027 |
| NM_021199 | sulfide quinone reductase-like (SQRDL)                                            | 7.43  | 5.28  | 16.58  | 19.16  | 0.025 |
| NM_024838 | threonine synthase-like 1 (THNSL1)                                                | 7.76  | 8.69  | 2.91   | 4.27   | 0.017 |
| NM_004613 | transglutaminase 2 (C polypeptide) (TGM2)                                         | 7.18  | 10.13 | 14.74  | 20.92  | 0.023 |
| NM_006351 | translocase of inner mitochondrial membrane 44 homolog (TIMM44)                   | 4.71  | 3.72  | 2.44   | 2.52   | 0.045 |
| NM_006809 | translocase of outer mitochondrial membrane 34 (TOMM34)                           | 2.55  | 2.07  | 5.84   | 4.25   | 0.019 |
| NM_004184 | tryptophanyl-tRNA synthetase (WARS)                                               | 16.50 | 11.74 | 5.83   | 4.64   | 0.031 |
| NM_003783 | UDP-Gal:betaGlcNAc beta 1,3-galactosyltransferase, polypeptide 2                  | 2.02  | 3.03  | 3.46   | 6.10   | 0.039 |

(B3GALT2)

|           |                                                                                                         |       |       |       |       |       |
|-----------|---------------------------------------------------------------------------------------------------------|-------|-------|-------|-------|-------|
| NM_007210 | UDP-N-acetyl-alpha-D-galactosamine:polypeptide N-acetylgalactosaminyltransferase 6 (GalNAc-T6) (GALNT6) | 3.35  | 3.21  | 6.01  | 6.65  | 0.043 |
| NM_012474 | uridine monophosphate kinase (UMPK)                                                                     | 2.59  | 1.83  | 6.46  | 3.70  | 0.027 |
| NM_003364 | uridine phosphorylase 1 (UPP1)                                                                          | 6.74  | 1.87  | 16.87 | 5.50  | 0.040 |
| NM_005715 | uronyl-2-sulfotransferase (UST)                                                                         | 15.60 | 10.75 | 7.56  | 7.01  | 0.020 |
| NM_175907 | zinc binding alcohol dehydrogenase, domain containing 2 (ZADH2)                                         | 18.43 | 18.86 | 9.24  | 11.69 | 0.036 |

### Channels/Transporters

|           |                                                                                         |       |       |       |       |       |
|-----------|-----------------------------------------------------------------------------------------|-------|-------|-------|-------|-------|
| NM_001681 | ATPase, Ca <sup>++</sup> transporting, cardiac muscle, slow twitch 2 (ATP2A2)           | 15.95 | 9.80  | 36.62 | 32.52 | 0.028 |
| NM_005603 | ATPase, Class I, type 8B, member 1 (ATP8B1)                                             | 1.14  | 0.71  | 2.86  | 2.23  | 0.045 |
| NM_130463 | ATPase, H <sup>+</sup> transporting, lysosomal 13kDa, V1 subunit G isoform 2 (ATP6V1G2) | 2.68  | 2.06  | 0.68  | 0.83  | 0.028 |
| NM_080282 | ATP-binding cassette, sub-family A (ABC1), member 10 (ABCA10)                           | 3.22  | 1.57  | 1.27  | 0.93  | 0.026 |
| NM_080284 | ATP-binding cassette, sub-family A (ABC1), member 6 (ABCA6)                             | 2.42  | 1.59  | 0.96  | 0.66  | 0.036 |
| NM_020038 | ATP-binding cassette, sub-family C (CFTR/MRP), member 3 (ABCC3)                         | 0.78  | 0.89  | 1.00  | 1.69  | 0.022 |
| NM_004827 | ATP-binding cassette, sub-family G (WHITE), member 2 (ABCG2)                            | 4.37  | 4.97  | 8.15  | 10.73 | 0.021 |
| NM_001289 | chloride intracellular channel 2 (CLIC2)                                                | 2.18  | 1.93  | 1.00  | 1.02  | 0.049 |
| NM_007235 | exportin, tRNA (nuclear export receptor for tRNAs) (XPOT)                               | 52.97 | 44.82 | 21.00 | 22.30 | 0.021 |
| NM_017885 | host cell factor C1 regulator 1 (XPO1 dependant) (HCFC1R1)                              | 72.21 | 61.72 | 20.77 | 26.71 | 0.019 |
| NM_006985 | nuclear pore complex interacting protein (NPIP)                                         | 84.69 | 76.40 | 41.17 | 38.90 | 0.029 |
| NM_014217 | potassium channel, subfamily K, member 2 (KCNK2)                                        | 9.52  | 17.24 | 12.86 | 19.51 | 0.042 |
| NM_172160 | potassium voltage-gated channel, shaker-related subfamily, beta member 1 (KCNAB1)       | 7.43  | 6.24  | 5.02  | 3.25  | 0.033 |
| NM_005549 | potassium voltage-gated channel, shaker-related subfamily, member 10 (KCNA10)           | 1.53  | 1.59  | 3.82  | 4.88  | 0.034 |
| NM_012281 | potassium voltage-gated channel, Shal-related subfamily, member 2 (KCND2)               | 2.30  | 1.08  | 1.04  | 1.03  | 0.031 |
| NM_003944 | selenium binding protein 1 (SELENBP1)                                                   | 6.86  | 8.51  | 3.16  | 3.66  | 0.042 |
| AK025584  | similar to 4F2 heavy chain                                                              | 53.51 | 43.31 | 17.95 | 17.82 | 0.044 |
| NM_012449 | six transmembrane epithelial antigen of the prostate (STEAP)                            | 0.55  | 0.70  | 2.51  | 6.29  | 0.019 |
| NM_014191 | sodium channel, voltage gated, type VIII, alpha (SCN8A)                                 | 3.44  | 2.89  | 6.53  | 9.37  | 0.026 |
| NM_004171 | solute carrier family 1 (glial high affinity glutamate transporter), member 2 (SLC1A2)  | 5.33  | 1.17  | 1.70  | 0.85  | 0.022 |
| NM_005628 | solute carrier family 1 (neutral amino acid transporter), member 5 (SLC1A5)             | 91.23 | 64.85 | 43.77 | 49.99 | 0.047 |

|                         |                                                                                                                |        |        |       |       |       |
|-------------------------|----------------------------------------------------------------------------------------------------------------|--------|--------|-------|-------|-------|
| NM_001046               | solute carrier family 12 (sodium/potassium/chloride transporters), member 2 (SLC12A2)                          | 4.14   | 3.23   | 2.46  | 1.79  | 0.040 |
| NM_004207               | solute carrier family 16 (monocarboxylic acid transporters), member 3 (SLC16A3)                                | 2.64   | 2.40   | 7.23  | 8.89  | 0.012 |
| NM_004696               | solute carrier family 16 (monocarboxylic acid transporters), member 4 (SLC16A4)                                | 15.65  | 9.70   | 8.27  | 4.21  | 0.020 |
| NM_006749               | solute carrier family 20 (phosphate transporter), member 2 (SLC20A2)                                           | 6.85   | 3.90   | 14.92 | 7.86  | 0.026 |
| NM_000387               | solute carrier family 25 (carnitine/acylcarnitine translocase), member 20 (SLC25A20)                           | 3.79   | 3.44   | 1.87  | 1.73  | 0.036 |
| NM_031481               | solute carrier family 25 (mitochondrial carrier), member 18 (SLC25A18)                                         | 0.85   | 2.01   | 0.23  | 0.46  | 0.023 |
| NM_024330               | solute carrier family 27 (fatty acid transporter), member 3 (SLC27A3)                                          | 4.08   | 4.33   | 1.66  | 2.66  | 0.026 |
| NM_015139               | solute carrier family 35 (UDP-glucuronic acid/UDP-N-acetylgalactosamine dual transporter), member D1 (SLC35D1) | 0.82   | 0.87   | 1.46  | 1.99  | 0.014 |
| NM_014854               | solute carrier family 35, member E2 (SLC35E2)                                                                  | 109.00 | 106.63 | 50.80 | 45.01 | 0.026 |
| NM_014585               | solute carrier family 40 (iron-regulated transporter), member 1 (SLC40A1)                                      | 3.20   | 3.79   | 0.62  | 1.37  | 0.009 |
| NM_017836               | solute carrier family 41, member 3 (SLC41A3)                                                                   | 10.10  | 7.35   | 4.65  | 4.74  | 0.026 |
| NM_007332               | transient receptor potential cation channel, subfamily A, member 1 (TRPA1)                                     | 0.58   | 0.28   | 2.36  | 1.91  | 0.010 |
| BC046362                | voltage-dependent calcium channel gamma subunit-like protein                                                   | 1.62   | 2.67   | 0.46  | 0.77  | 0.033 |
| <b>Unknown function</b> |                                                                                                                |        |        |       |       |       |
| NM_030802               | C/EBP-induced protein (LOC81558)                                                                               | 2.03   | 2.03   | 1.02  | 1.14  | 0.034 |
| NM_016053               | CGI-116 protein (CGI-116)                                                                                      | 10.79  | 10.16  | 5.13  | 5.88  | 0.018 |
| NM_025214               | CTCL tumor antigen se57-1 (SE57-1)                                                                             | 2.60   | 5.78   | 1.11  | 2.47  | 0.023 |
| NM_020223               | family with sequence similarity 20, member C (FAM20C)                                                          | 10.27  | 6.15   | 24.23 | 20.01 | 0.022 |
| NM_015916               | family with sequence similarity 26, member B (FAM26B)                                                          | 11.23  | 8.51   | 3.62  | 3.10  | 0.022 |
| BC040073                | H19, imprinted maternally expressed untranslated mRNA                                                          | 13.16  | 16.85  | 3.75  | 6.19  | 0.041 |
| NM_032853               | melanoma associated antigen (mutated) 1 (MUM1)                                                                 | 14.20  | 9.93   | 9.00  | 6.76  | 0.035 |
| AF220263                | MOST2                                                                                                          | 7.95   | 5.39   | 3.73  | 2.63  | 0.049 |
| NM_197955               | normal mucosa of esophagus specific 1 (NMES1)                                                                  | 0.28   | 0.20   | 2.13  | 3.04  | 0.048 |
| NM_031915               | SET domain, bifurcated 2 (SETDB2)                                                                              | 6.82   | 6.24   | 2.69  | 2.95  | 0.038 |
| NM_021967               | small EDRK-rich factor 1A (telomeric) (SERF1A)                                                                 | 7.13   | 5.25   | 4.60  | 3.36  | 0.033 |

<sup>a</sup>Statistical differences in gene expression were calculated by GeneSpring 7.3.

Supplemental Table 2. Differential gene expression (averages, Avg, n=3) in cultured endometrial stromal cells (T-HESC) under control conditions (Ctl), in the presence of estrogen plus progesterone (E+P), treated with macrophage conditioned medium along (Mph CM), or treated with E+P+Mph CM.<sup>a</sup>

| GenBank Accession #          | Description                                                                   | Ctl Avg | E+P Avg | Mph CM | E+P+ MphCM | p value |
|------------------------------|-------------------------------------------------------------------------------|---------|---------|--------|------------|---------|
| <b>Signal Transduction</b>   |                                                                               |         |         |        |            |         |
| NM_000867                    | 5-hydroxytryptamine (serotonin) receptor 2B (HTR2B)                           | 63.80   | 18.47   | 43.05  | 30.13      | 0.034   |
| NM_001946                    | dual specificity phosphatase 6 (DUSP6)                                        | 4.63    | 1.34    | 4.31   | 3.91       | 0.030   |
| NM_206963                    | retinoic acid receptor responder (tazarotene induced) 1 (RARRES1)             | 4.10    | 1.21    | 7.43   | 3.65       | 0.025   |
| NM_021643                    | tribbles homolog 2 (TRIB2)                                                    | 25.81   | 8.28    | 18.35  | 12.65      | 0.017   |
| NM_004787                    | slit homolog 2 (SLIT2)                                                        | 7.15    | 2.48    | 3.82   | 1.98       | 0.022   |
| NM_002924                    | regulator of G-protein signalling 7 (RGS7)                                    | 6.80    | 2.40    | 3.51   | 2.26       | 0.026   |
| NM_002889                    | retinoic acid receptor responder (tazarotene induced) 2 (RARRES2)             | 97.17   | 38.21   | 161.32 | 61.02      | 0.037   |
| NM_181784                    | sprouty-related, EVH1 domain containing 2 (SPRED2)                            | 10.47   | 4.14    | 7.56   | 5.78       | 0.036   |
| NM_004101                    | coagulation factor II (thrombin) receptor-like 2 (F2RL2)                      | 3.32    | 1.38    | 2.45   | 0.93       | 0.017   |
| NM_003507                    | frizzled homolog 7 (FZD7)                                                     | 19.98   | 8.78    | 26.76  | 27.40      | 0.022   |
| NM_007115                    | tumor necrosis factor, alpha-induced protein 6 (TNFAIP6)                      | 22.91   | 10.15   | 20.21  | 21.73      | 0.017   |
| NM_004431                    | EphA2 (EPHA2)                                                                 | 5.82    | 2.63    | 7.56   | 5.32       | 0.023   |
| NM_170732                    | brain-derived neurotrophic factor (BDNF)                                      | 4.07    | 1.86    | 7.09   | 3.44       | 0.033   |
| NM_005475                    | lymphocyte adaptor protein (LNK)                                              | 6.05    | 2.80    | 5.50   | 4.37       | 0.043   |
| NM_203418                    | Down syndrome critical region gene 1 (DSCR1)                                  | 10.30   | 4.79    | 19.94  | 12.78      | 0.026   |
| AW189008                     | similar to signal transducer and activator of transcription 1- $\alpha/\beta$ | 2.14    | 1.01    | 2.40   | 2.46       | 0.037   |
| NM_004073                    | polo-like kinase 3 (PLK3)                                                     | 3.91    | 1.85    | 6.80   | 4.40       | 0.035   |
| NM_001992                    | coagulation factor II (thrombin) receptor (F2R)                               | 6.11    | 2.94    | 4.95   | 1.38       | 0.019   |
| NM_018948                    | mitogen-inducible gene 6 (MIG-6)                                              | 1.76    | 3.92    | 1.39   | 2.14       | 0.024   |
| NM_198569                    | G protein-coupled receptor 126 (GPR126)                                       | 2.24    | 5.10    | 1.29   | 1.69       | 0.022   |
| NM_002923                    | regulator of G-protein signalling 2, 24kDa (RGS2)                             | 8.71    | 23.45   | 5.33   | 4.55       | 0.041   |
| NM_012242                    | dickkopf homolog 1 (DKK1) [Wnt pathway]                                       | 24.50   | 67.08   | 39.28  | 35.58      | 0.034   |
| NM_016084                    | RAS, dexamethasone-induced 1 (RASD1)                                          | 1.00    | 3.28    | 0.85   | 0.87       | 0.012   |
| NM_000618                    | insulin-like growth factor 1 (somatomedin C) (IGF1)                           | 2.20    | 9.74    | 2.12   | 1.95       | 0.032   |
| NM_001629                    | arachidonate 5-lipoxygenase-activating protein (ALOX5AP)                      | 0.61    | 3.47    | 0.76   | 0.95       | 0.030   |
| NM_002193                    | inhibin, beta B (activin AB beta polypeptide) (INHBB)                         | 2.99    | 21.25   | 1.52   | 15.81      | 0.015   |
| NM_000597                    | insulin-like growth factor binding protein 2 (36kD) (IGFBP2)                  | 1.20    | 11.17   | 0.72   | 4.75       | 0.023   |
| <b>Proteases and related</b> |                                                                               |         |         |        |            |         |
| NM_007289                    | membrane metallo-endopeptidase (MME)                                          | 2.13    | 4.84    | 3.44   | 7.92       | 0.048   |

|                                   |                                                                               |        |        |       |        |       |
|-----------------------------------|-------------------------------------------------------------------------------|--------|--------|-------|--------|-------|
| NM_006587                         | corin, serine protease (CORIN)                                                | 4.16   | 29.63  | 2.25  | 20.48  | 0.012 |
| <b>Transcriptional regulation</b> |                                                                               |        |        |       |        |       |
| NM_004454                         | ets variant gene 5 (ets-related molecule) (ETV5)                              | 18.28  | 5.40   | 19.63 | 14.45  | 0.017 |
| NM_002166                         | inhibitor of DNA binding 2, dominant negative helix-loop-helix protein (ID2)  | 4.86   | 1.53   | 4.61  | 3.23   | 0.039 |
| NM_002518                         | neuronal PAS domain protein 2 (NPAS2)                                         | 3.93   | 1.43   | 2.99  | 2.64   | 0.033 |
| NM_003483                         | high mobility group AT-hook 2 (HMGA2)                                         | 20.30  | 7.58   | 32.31 | 22.34  | 0.019 |
| NM_030762                         | basic helix-loop-helix domain containing, class B, 3 (BHLHB3)                 | 2.40   | 1.08   | 1.53  | 1.18   | 0.026 |
| BC033086                          | transcription factor 19 (SC1)                                                 | 15.24  | 7.17   | 16.48 | 10.98  | 0.043 |
| NM_080390                         | my048 protein (my048)                                                         | 69.50  | 150.64 | 45.94 | 100.52 | 0.017 |
| NM_198057                         | delta sleep inducing peptide, immunoreactor (DSIPI)                           | 8.30   | 38.46  | 7.40  | 19.09  | 0.022 |
| NM_006006                         | zinc finger protein 145 (Kruppel-like) (ZNF145)                               | 0.76   | 7.66   | 0.83  | 6.44   | 0.013 |
| <b>Cytoskeleton</b>               |                                                                               |        |        |       |        |       |
| NM_012334                         | myosin X (MYO10)                                                              | 8.28   | 2.28   | 10.13 | 3.36   | 0.022 |
| NM_031957                         | keratin associated protein 1-5 (KRTAP1-5)                                     | 7.57   | 2.35   | 9.98  | 8.65   | 0.034 |
| NM_031217                         | kinesin family member 18A                                                     | 3.35   | 1.24   | 3.14  | 1.93   | 0.032 |
| NM_015894                         | stathmin-like 3 (STMN3)                                                       | 5.42   | 2.51   | 6.02  | 4.89   | 0.038 |
| NM_020859                         | Shroom-related protein (ShrmL)                                                | 6.64   | 3.17   | 13.01 | 11.66  | 0.019 |
| NM_004010                         | dystrophin (DMD)                                                              | 4.75   | 13.07  | 6.60  | 7.02   | 0.021 |
| <b>Defense/Immunity</b>           |                                                                               |        |        |       |        |       |
| NM_004946                         | dedicator of cytokinesis 2 (DOCK2)                                            | 5.34   | 1.87   | 9.63  | 5.10   | 0.014 |
| NM_000609                         | chemokine (C-X-C motif) ligand 12 (stromal cell-derived factor 1) (CXCL12)    | 99.29  | 49.70  | 76.34 | 64.81  | 0.041 |
| <b>Cell cycle/cell death</b>      |                                                                               |        |        |       |        |       |
| NM_199414                         | protein regulator of cytokinesis 1 (PRC1)                                     | 10.90  | 4.58   | 12.05 | 6.61   | 0.042 |
| <b>Adhesion</b>                   |                                                                               |        |        |       |        |       |
| NM_014344                         | four jointed box 1 (FJX1)                                                     | 50.50  | 11.66  | 45.66 | 17.48  | 0.033 |
| NM_015419                         | adlican                                                                       | 8.31   | 2.98   | 9.24  | 6.75   | 0.038 |
| NM_005602                         | claudin 11 (oligodendrocyte transmembrane protein) (CLDN11)                   | 148.76 | 53.43  | 81.95 | 53.02  | 0.036 |
| <b>Extracellular matrix</b>       |                                                                               |        |        |       |        |       |
| NM_001850                         | collagen, type VIII, alpha 1 (COL8A1)                                         | 10.84  | 5.37   | 11.80 | 7.52   | 0.037 |
| NM_001937                         | dermatopontin (DPT)                                                           | 4.14   | 21.27  | 2.17  | 8.55   | 0.040 |
| <b>Oxidation/Reduction</b>        |                                                                               |        |        |       |        |       |
| NM_002084                         | glutathione peroxidase 3 (plasma) (GPX3)                                      | 0.72   | 1.45   | 0.79  | 8.40   | 0.050 |
| <b>Ubiquitin system</b>           |                                                                               |        |        |       |        |       |
| NM_005358                         | LIM domain only 7 (LMO7)                                                      | 8.90   | 3.29   | 6.99  | 4.43   | 0.031 |
| NM_020799                         | associated molecule with the SH3 domain of STAM (AMSH) like protein (AMSH-LP) | 23.77  | 9.31   | 22.33 | 14.16  | 0.033 |

|                                |                                                                              |       |       |       |       |       |
|--------------------------------|------------------------------------------------------------------------------|-------|-------|-------|-------|-------|
| NM_014176                      | HSPC150 protein similar to ubiquitin-conjugating enzyme (HSPC150)            | 20.38 | 10.27 | 37.10 | 24.13 | 0.027 |
| <b>Lipid metabolism</b>        |                                                                              |       |       |       |       |       |
| NM_001647                      | apolipoprotein D (APOD)                                                      | 1.83  | 4.20  | 0.98  | 2.04  | 0.045 |
| <b>Membrane proteins</b>       |                                                                              |       |       |       |       |       |
| NM_002522                      | neuronal pentraxin I (NPTX1)                                                 | 40.92 | 2.22  | 68.46 | 22.48 | 0.009 |
| NM_032812                      | plexin domain containing 2 (PLXDC2)                                          | 7.53  | 1.84  | 3.88  | 1.24  | 0.023 |
| <b>Nucleic acid regulation</b> |                                                                              |       |       |       |       |       |
| NM_006739                      | MCM5 minichromosome maintenance deficient 5, cell division cycle 46 (MCM5)   | 4.99  | 2.26  | 8.24  | 7.07  | 0.032 |
| NM_018518                      | MCM10 minichromosome maintenance deficient 10 (MCM10)                        | 2.35  | 1.12  | 4.51  | 2.81  | 0.025 |
| <b>Enzymes/Metabolism</b>      |                                                                              |       |       |       |       |       |
| NM_032211                      | lysyl oxidase-like 4 (LOXL4)                                                 | 39.02 | 7.68  | 30.53 | 13.39 | 0.013 |
| NM_003033                      | sialyltransferase 4A (beta-galactoside alpha-2,3-sialyltransferase) (SIAT4A) | 12.72 | 5.28  | 13.03 | 8.80  | 0.023 |
| NM_003358                      | UDP-glucose ceramide glucosyltransferase (UGCG)                              | 13.55 | 6.63  | 23.80 | 22.61 | 0.030 |
| NM_006926                      | surfactant, pulmonary-associated protein A2 (SFTPA2)                         | 1.38  | 2.84  | 2.72  | 3.41  | 0.047 |
| NM_001874                      | carboxypeptidase M (CPM)                                                     | 13.26 | 39.73 | 11.50 | 45.04 | 0.027 |
| NM_019886                      | carbohydrate (N-acetylglucosamine 6-O) sulfotransferase 7 (CHST7)            | 2.02  | 10.99 | 1.81  | 3.36  | 0.022 |
| <b>Channels/Transporters</b>   |                                                                              |       |       |       |       |       |
| NM_000519                      | hemoglobin, delta (HBD)                                                      | 8.40  | 1.31  | 5.41  | 1.13  | 0.010 |
| NM_005415                      | solute carrier family 20 (phosphate transporter), member 1 (SLC20A1)         | 17.51 | 8.08  | 22.73 | 19.04 | 0.025 |
| NM_002245                      | potassium channel, subfamily K, member 1 (KCNK1)                             | 1.70  | 0.85  | 2.23  | 1.93  | 0.030 |
| <b>Unknown function</b>        |                                                                              |       |       |       |       |       |
| NM_017565                      | family with sequence similarity 20, member A (FAM20A)                        | 20.34 | 8.66  | 21.44 | 25.02 | 0.019 |
| NM_002616                      | period homolog 1 (PER1)                                                      | 1.81  | 6.18  | 2.12  | 3.60  | 0.024 |

<sup>a</sup>Statistical differences in gene expression were calculated by GeneSpring 7.3.

**Supplemental Table 3.** Genes differentially expressed in T-HESC cells in response to both macrophage CM and monocyte CM<sup>a</sup>.

| <i>GenBank</i> | Gene Name                                                                                                       | Fold MphCM <sup>b</sup> | Fold MonoCM <sup>c</sup> |
|----------------|-----------------------------------------------------------------------------------------------------------------|-------------------------|--------------------------|
| NM_053001      | Odd-skipped-related 2A protein (OSR2)                                                                           | 0.09                    | 0.19                     |
| NM_032592      | 1-aminocyclopropane-1-carboxylate synthase (PHACS)<br>A disintegrin and metalloproteinase domain 33<br>(ADAM33) | 0.31                    | 0.22                     |
| NM_153202      |                                                                                                                 | 0.25                    | 0.4                      |
| NM_003500      | Acyl-Coenzyme A oxidase 2, branched chain (ACOX2)<br>aldehyde dehydrogenase 3 family, member A2<br>(ALDH3A2)    | 0.40                    | 0.19                     |
| NM_000382      |                                                                                                                 | 0.41                    | 0.3                      |
| NM_020978      | Amylase, alpha 2B; pancreatic (AMY2B)                                                                           | 0.38                    | 0.37                     |
| NM_133265      | Angiomotin (AMOT)                                                                                               | 0.15                    | 0.07                     |
| NM_004282      | BCL2-associated athanogene 2 (BAG2)                                                                             | 0.46                    | 0.25                     |
| NM_001704      | Brain-specific angiogenesis inhibitor 3 (BAI3)                                                                  | 0.11                    | 0.05                     |
| NM_000070      | Calpain 3, (p94) (CAPN3)                                                                                        | 0.50                    | 0.18                     |
| NM_001752      | Catalase (CAT)                                                                                                  | 0.35                    | 0.21                     |
| NM_020404      | CD164 sialomucin-like 1 (CD164L1)                                                                               | 0.52                    | 0.18                     |
| NM_001289      | Chloride intracellular channel 2 (CLIC2)                                                                        | 0.46                    | 0.24                     |
| NM_206808      | Citrate lyase beta like (CLYBL)                                                                                 | 0.28                    | 0.31                     |
| NM_019058      | DNA-damage-inducible transcript 4 (DDIT4)                                                                       | 0.26                    | 0.21                     |
| NM_003462      | dynein, axonemal, light intermediate polypeptide 1<br>(DNALI1)                                                  | 0.50                    | 0.38                     |
| NM_004438      | EphA4 (EPHA4)                                                                                                   | 0.37                    | 0.27                     |
| NM_001439      | Exostoses (multiple)-like 2 (EXTL2)                                                                             | 0.50                    | 0.31                     |
| NM_012304      | F-box and leucine-rich repeat protein 7 (FBXL7)                                                                 | 0.40                    | 0.15                     |
| NM_183420      | F-box protein 25 (FBXO25)                                                                                       | 0.48                    | 0.33                     |
| NM_199135      | FOXD4-like 2 (FOXD4L2)                                                                                          | 0.44                    | 0.13                     |
| NM_001505      | G protein-coupled receptor 30 (GPR30)                                                                           | 0.41                    | 0.1                      |
| NM_173537      | GTF2I repeat domain containing 2 (GTF2IRD2)<br>GULP engulfment adaptor PTB domain containing 1<br>(GULP1)       | 0.39                    | 0.19                     |
| NM_016315      |                                                                                                                 | 0.48                    | 0.2                      |
| NM_021973      | Heart and neural crest derivatives expressed 2 (HAND2)                                                          | 0.49                    | 0.5                      |
| NM_199072      | I-mfa domain-containing protein (HIC)                                                                           | 0.41                    | 0.2                      |
| NM_002222      | Inositol 1,4,5-triphosphate receptor, type 1 (ITPR1)                                                            | 0.32                    | 0.24                     |
| NM_014214      | Inositol(myo)-1(or 4)-monophosphatase 2 (IMPA2)                                                                 | 0.49                    | 0.36                     |
| NM_000210      | Integrin, alpha 6 (ITGA6)                                                                                       | 0.21                    | 0.26                     |
| NM_017415      | Kelch-like 3 (KLHL3)                                                                                            | 0.23                    | 0.14                     |
| NM_014509      | Kraken-like (serine hydrolase-like 2) (SERHL2)                                                                  | 0.42                    | 0.34                     |
| NM_005824      | Leucine rich repeat containing 17 (LRRC17)                                                                      | 0.28                    | 0.06                     |
| NM_006859      | Lipoic acid synthetase (LIAS)                                                                                   | 0.41                    | 0.36                     |
| NM_145015      | MAS-related GPR, member F (MRGPRF)                                                                              | 0.43                    | 0.33                     |
| NM_016256      | N-acetylglucosamine-1-phosphodiester alpha-N-<br>acetylglucosaminidase (NAGPA)                                  | 0.49                    | 0.26                     |
| NM_022477      | NDRG family member 3 (NDRG3)                                                                                    | 0.50                    | 0.36                     |
| NM_033014      | osteoglycin (osteoinductive factor, mimecan) (OGN)                                                              | 0.29                    | 0.32                     |
| NM_005014      | Osteomodulin (OMD)                                                                                              | 0.38                    | 0.24                     |
| NM_032623      | Ovary-specific acidic protein (OSAP)                                                                            | 0.45                    | 0.11                     |
| NM_003711      | Phosphatidic acid phosphatase type 2A (PPAP2A)                                                                  | 0.29                    | 0.24                     |

|                  |                                                                                                        |       |       |
|------------------|--------------------------------------------------------------------------------------------------------|-------|-------|
| <i>NM_181523</i> | Phosphoinositide-3-kinase, regulatory subunit 1 (p85 alpha) (PIK3R1)                                   | 0.35  | 0.23  |
| <i>NM_003629</i> | Phosphoinositide-3-kinase, regulatory subunit 3 (p55, gamma) (PIK3R3)                                  | 0.27  | 0.06  |
| <i>NM_019012</i> | Phosphoinositol 3-phosphate-binding protein-2 (PEPP2)                                                  | 0.56  | 0.13  |
| <i>NM_002863</i> | Phosphorylase, glycogen; liver (PYGL)                                                                  | 0.38  | 0.34  |
| <i>NM_016277</i> | RAB23, member RAS oncogene family (RAB23)                                                              | 0.45  | 0.49  |
| <i>NM_198230</i> | regulator of G-protein signalling 12 (RGS12)                                                           | 0.40  | 0.35  |
| <i>NM_020809</i> | Rho GTPase activating protein 20 (ARHGAP20)                                                            | 0.38  | 0.19  |
| <i>NM_013427</i> | Rho GTPase activating protein 6 (ARHGAP6)                                                              | 0.17  | 0.29  |
| <i>NM_004755</i> | Ribosomal protein S6 kinase, 90kDa, polypeptide 5 (RPS6KA5)                                            | 0.22  | 0.36  |
| <i>NM_020796</i> | Sema domain, transmembrane domain (TM), and cytoplasmic domain, (semaphorin) 6A (SEMA6A)               | 0.13  | 0.08  |
| <i>NM_004657</i> | Serum deprivation response (SDPR)                                                                      | 0.37  | 0.23  |
| <i>NM_004844</i> | SH3-domain binding protein 5 (BTK-associated) (SH3BP5)                                                 | 0.42  | 0.36  |
| <i>NM_198519</i> | Similar to Cytochrome c, somatic solute carrier family 27 (fatty acid transporter), member 3 (SLC27A3) | 0.37  | 0.15  |
| <i>NM_024330</i> | Solute carrier family 35, member E2 (SLC35E2)                                                          | 0.41  | 0.37  |
| <i>NM_014854</i> | Solute carrier family 40, member 1 (SLC40A1)                                                           | 0.47  | 0.29  |
| <i>NM_014585</i> | Sphingomyelin phosphodiesterase, acid-like 3A (SMPDL3A)                                                | 0.19  | 0.11  |
| <i>NM_006714</i> | Splicing factor, arginine/serine-rich 6 (SFRS6)                                                        | 0.28  | 0.15  |
| <i>NM_006275</i> | Tetratricopeptide repeat domain 10 (TTC10)                                                             | 0.55  | 0.34  |
| <i>NM_006531</i> | TGF $\beta$ inducible early growth response 2 (TIEG2)                                                  | 0.36  | 0.21  |
| <i>NM_003597</i> | Threonine synthase-like 1 (THNSL1)                                                                     | 0.52  | 0.43  |
| <i>NM_024838</i> | Transducin (beta)-like 1X-linked (TBL1X)                                                               | 0.38  | 0.18  |
| <i>NM_005647</i> | Transducin-like enhancer of split 1 (E(sp1) homolog) (TLE1)                                            | 0.37  | 0.15  |
| <i>NM_005077</i> | Transmembrane protein 17 (TMEM17)                                                                      | 0.36  | 0.28  |
| <i>NM_198276</i> | Tripartite motif-containing 45 (TRIM45)                                                                | 0.38  | 0.16  |
| <i>NM_025188</i> | Truncated calcium binding protein                                                                      | 0.26  | 0.15  |
| <i>NM_016175</i> | Uronyl-2-sulfotransferase (UST)                                                                        | 0.47  | 0.2   |
| <i>NM_005715</i> | Zinc binding alcohol dehydrogenase, domain containing 2 (ZADH2)                                        | 0.48  | 0.23  |
| <i>NM_175907</i> | Zinc finger protein 177 (ZNF177)                                                                       | 0.50  | 0.2   |
| <i>NM_003451</i> | Zinc finger protein 291 (ZNF291)                                                                       | 0.50  | 0.27  |
| <i>NM_020843</i> | Zinc finger protein 32 (KOX 30) (ZNF32)                                                                | 0.56  | 0.28  |
| <i>NM_006973</i> | Zinc finger protein 575 (ZNF575)                                                                       | 0.51  | 0.24  |
| <i>NM_174945</i> |                                                                                                        | 0.26  | 0.2   |
| <i>NM_004419</i> | Dual specificity phosphatase 5 (DUSP5)                                                                 | 1.90  | 30.15 |
| <i>NM_153000</i> | Adenomatosis polyposis coli down-regulated 1 (APCDD1)                                                  | 2.03  | 0.1   |
| <i>NM_001638</i> | Apolipoprotein F (APOF)                                                                                | 2.00  | 4.31  |
| <i>NM_170665</i> | ATPase, Ca <sup>++</sup> transporting, cardiac muscle, slow twitch 2 (ATP2A2)                          | 2.30  | 2.92  |
| <i>NM_005242</i> | Coagulation factor II (thrombin) receptor-like 1 (F2RL1)                                               | 10.11 | 5.66  |
| <i>NM_001343</i> | disabled homolog 2 (DAB2)                                                                              | 2.01  | 2.33  |
| <i>NM_012081</i> | elongation factor, RNA polymerase II, 2 (ELL2)                                                         | 2.04  | 5.26  |
| <i>NM_005438</i> | FOS-like antigen 1 (FOSL1)                                                                             | 2.50  | 6.54  |



|                  |                                                                         |       |       |
|------------------|-------------------------------------------------------------------------|-------|-------|
| <i>NM_005458</i> | G protein-coupled receptor 51 (GPR51)                                   | 2.15  | 4.99  |
| <i>NM_013372</i> | Gremlin 1 homolog, cysteine knot superfamily (GREM1)                    | 5.99  | 5.74  |
| <i>NM_145904</i> | High mobility group AT-hook 1 (HMGA1)                                   | 2.42  | 7.02  |
| <i>NM_000599</i> | Insulin-like growth factor binding protein 5 (IGFBP5)                   | 5.89  | 3.97  |
| <i>NM_002189</i> | Interleukin 15 receptor, alpha (IL15RA)                                 | 4.57  | 2.77  |
| <i>NM_000600</i> | interleukin 6 (interferon, beta 2) (IL6)                                | 2.67  | 2     |
| <i>NM_030952</i> | likely ortholog of rat SNF1/AMP-activated protein kinase (SNARK)        | 2.02  | 1.85  |
| <i>NM_012320</i> | lysophospholipase 3 (lysosomal phospholipase A2) (LYPLA3)               | 6.19  | 11.58 |
| <i>NM_002317</i> | Lysyl oxidase (LOX)                                                     | 1.99  | 3.97  |
| <i>NM_145110</i> | Mitogen-activated protein kinase kinase 3 (MAP2K3)                      | 2.16  | 5.31  |
| <i>NM_004221</i> | Natural killer cell transcript 4 (NK4)                                  | 16.15 | 3.74  |
| <i>NM_002659</i> | Plasminogen activator, urokinase receptor (PLAUR)                       | 3.68  | 3.06  |
| <i>NM_002867</i> | RAB3B, member RAS oncogene family (RAB3B)                               | 1.97  | 4.13  |
| <i>NM_000636</i> | Superoxide dismutase 2, mitochondrial (SOD2)                            | 14.81 | 5.61  |
| <i>NM_006926</i> | Surfactant, pulmonary-associated protein A2 (SFTPA2)                    | 1.97  | 2.85  |
| <i>NM_006058</i> | TNFAIP3 interacting protein 1 (TNIP1)                                   | 1.99  | 3.25  |
| <i>NM_012323</i> | v-maf musculoaponeurotic fibrosarcoma oncogene homolog F (avian) (MAFF) | 2.96  | 5.1   |

<sup>a</sup>Statistical differences in gene expression were calculated with GeneSpring 7.3 software.

<sup>b</sup>Fold decrease or increase in T-HESC gene expression in response to macrophage CM compared to control.

<sup>c</sup>Fold decrease or increase in T-HESC gene expression in response to monocyte CM<sup>12</sup> compared to control.
